# Supplementary material for: Stereoselective Epoxidation of Triterpenic Allylic Alcohols and Cytotoxicity Evaluation of Synthesized Compounds
Source: MDPI journal article supplement (doi:10.3390/molecules28020550), 2023-01-05
Supplement: s1 [file s1]

## Supporting Information

### Stereoselective Epoxidation of Triterpenic Allylic Alcohols and Cytotoxicity Evaluation of Synthesized Compounds

Krainova Gulnaz F. <sup>a</sup>, Yulia A. Beloglazova <sup>a</sup>, Maksim V. Dmitriev <sup>b</sup>, Victoria V. Grishko <sup>a,\*</sup>

<sup>1</sup>Institute of Technical Chemistry, Perm Federal Research Center, Ural Branch of the Russian Academy of Sciences, Acad. Korolev St. 3, 614013 Perm, Russia

<sup>2</sup>Department of Organic Chemistry, Perm State University, Bukirev St. 15, 614990 Perm, Russia;

\*Corresponding author. Tel.: +7-342-2378265; fax: +7-342-2378262;  
e-mail: [grishko.v@itcras.ru](mailto:grishko.v@itcras.ru)

#### NMR and GC-MS spectra of synthesized compounds

##### <sup>1</sup>H NMR (3*S*)-3 $\beta$ -hydroxy-2-methyl-19 $\beta$ ,28-epoxy-18 $\alpha$ *H*-olean-1-ene (3)

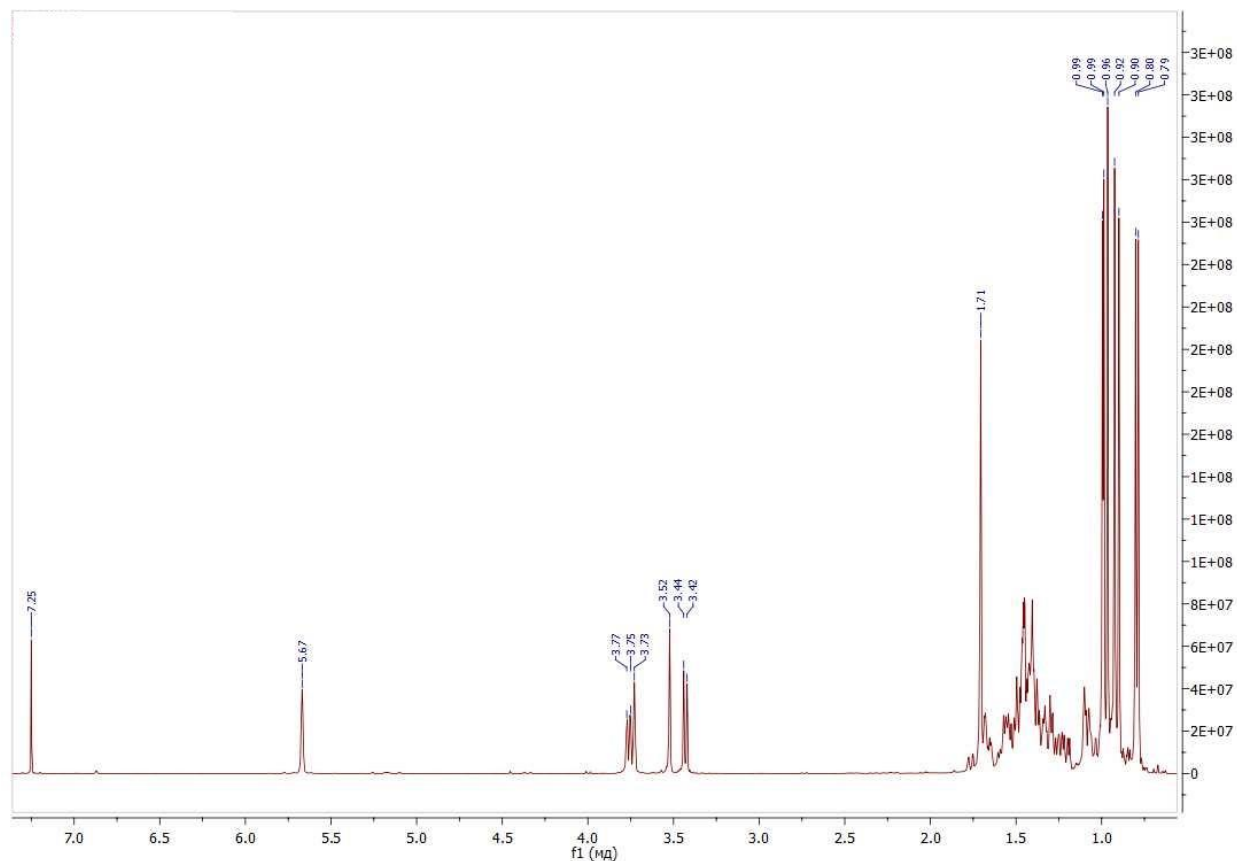

##### <sup>13</sup>C NMR (CDCl<sub>3</sub>) (3*S*)-3 $\beta$ -hydroxy-2-methyl-19 $\beta$ ,28-epoxy-18 $\alpha$ *H*-olean-1-ene (3)

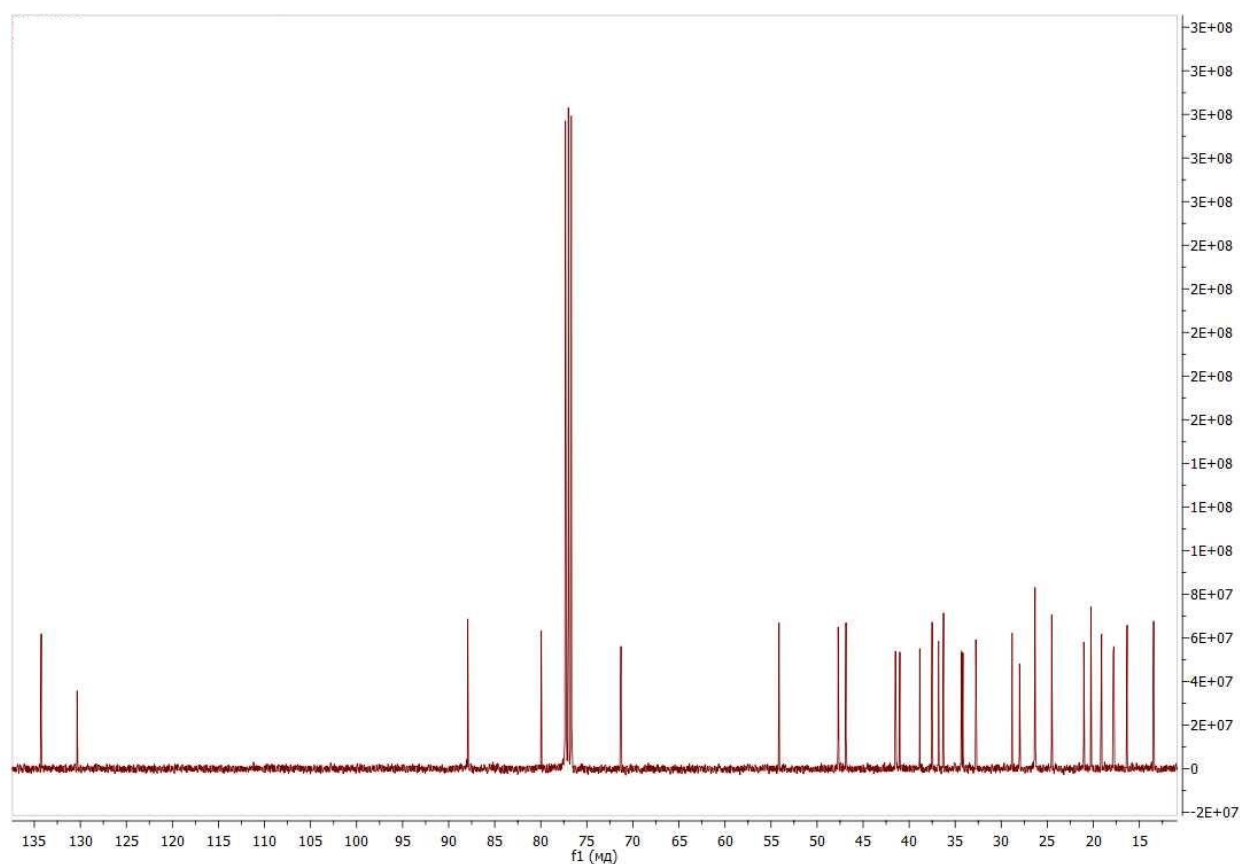

**GC-MS (3*S*)-3 $\beta$ -hydroxy-2-methyl-19 $\beta$ ,28-epoxy-18*aH*-olean-1-ene (3)**

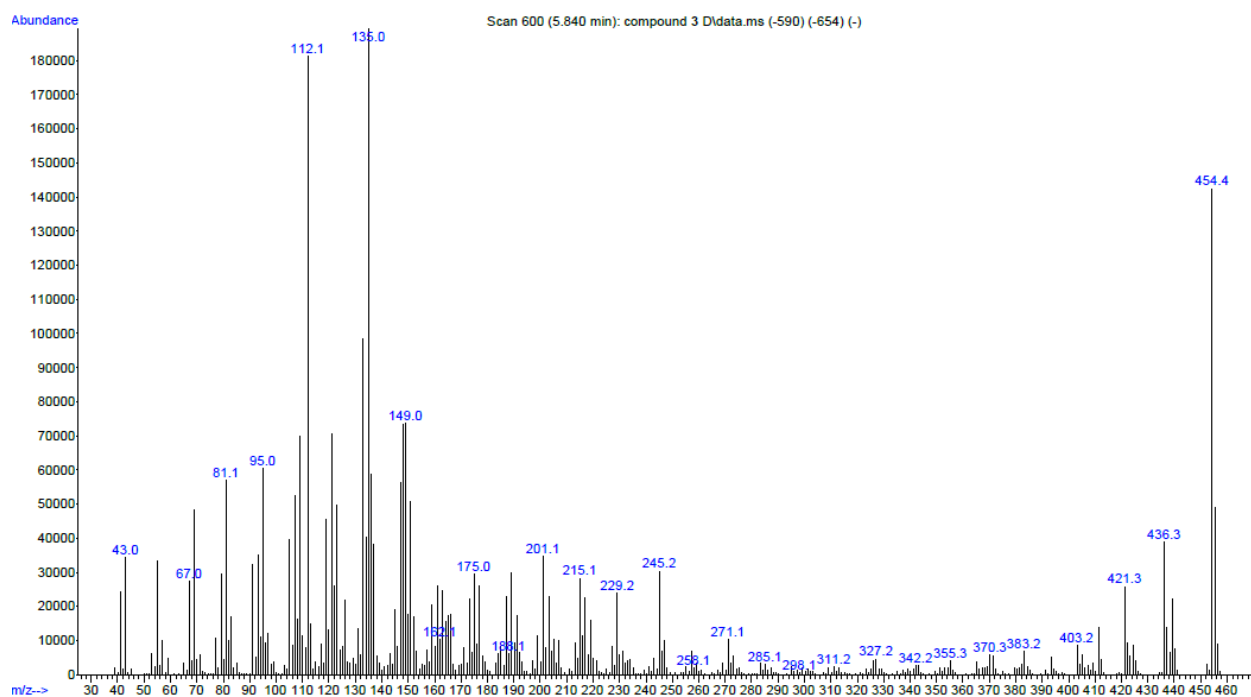

**$^1\text{H}$  NMR (1*R*,2*R*)-2-methyl-3-oxo-(1,2),(19 $\beta$ ,28)-diepoxy-18*aH*-oleanane (4a)**

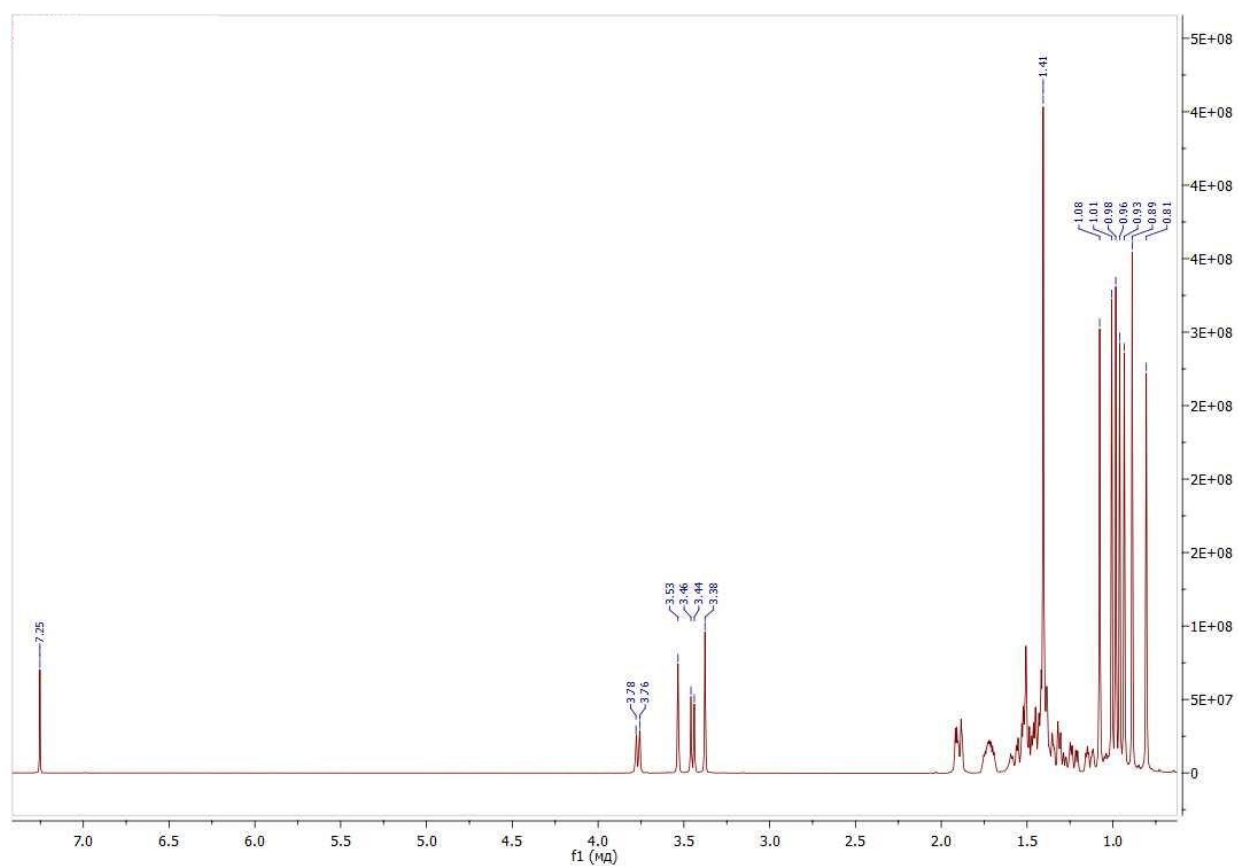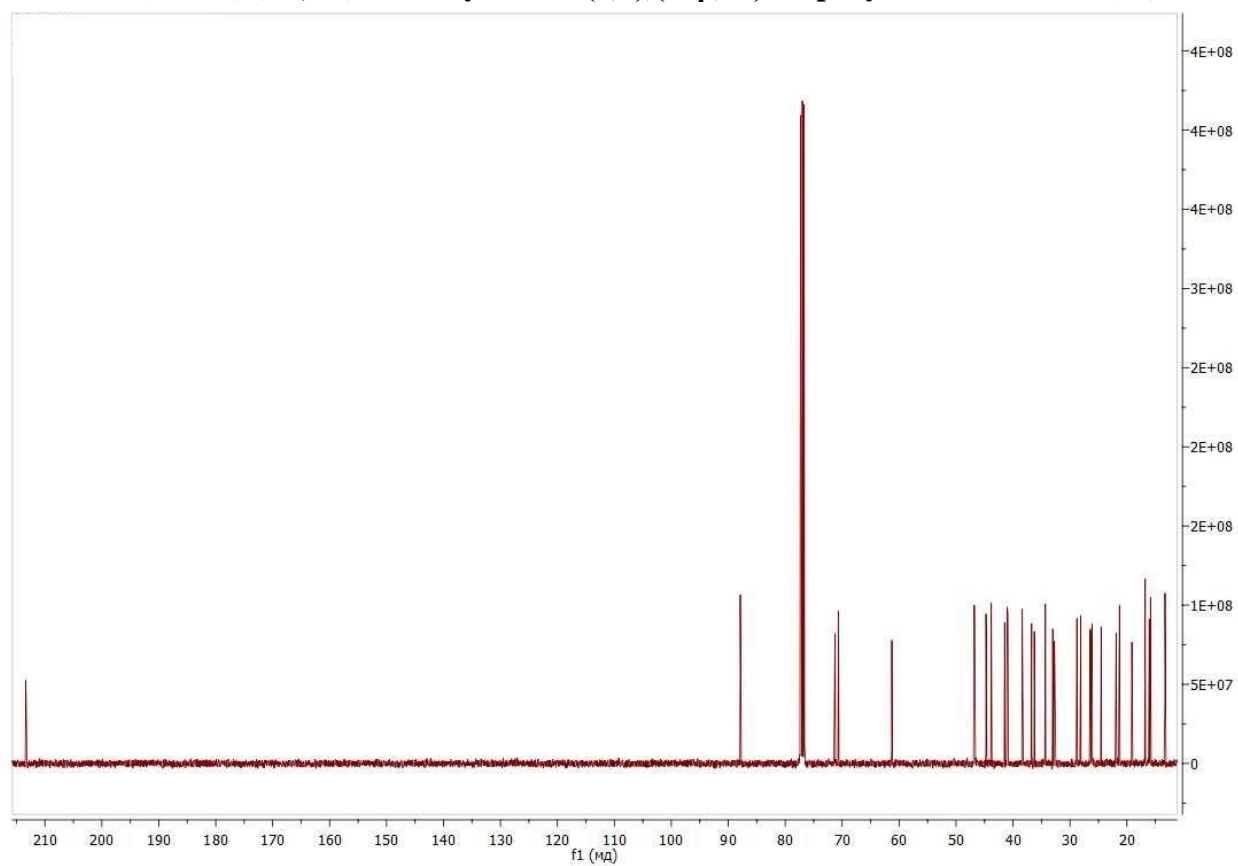

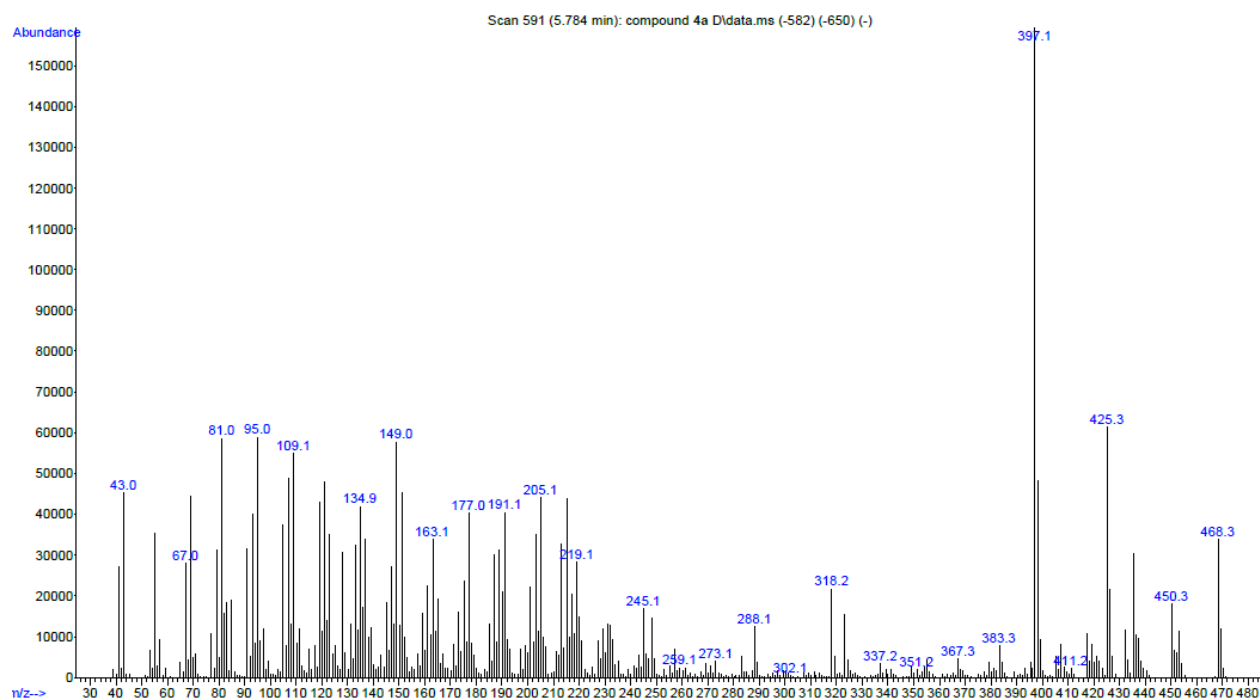

**<sup>1</sup>H NMR (1*R*,2*S*,3*R*)-3β-hydroxy-2-methyl-(1,2),(19β,28)-diepoxy-18*aH*-oleanane (5)**

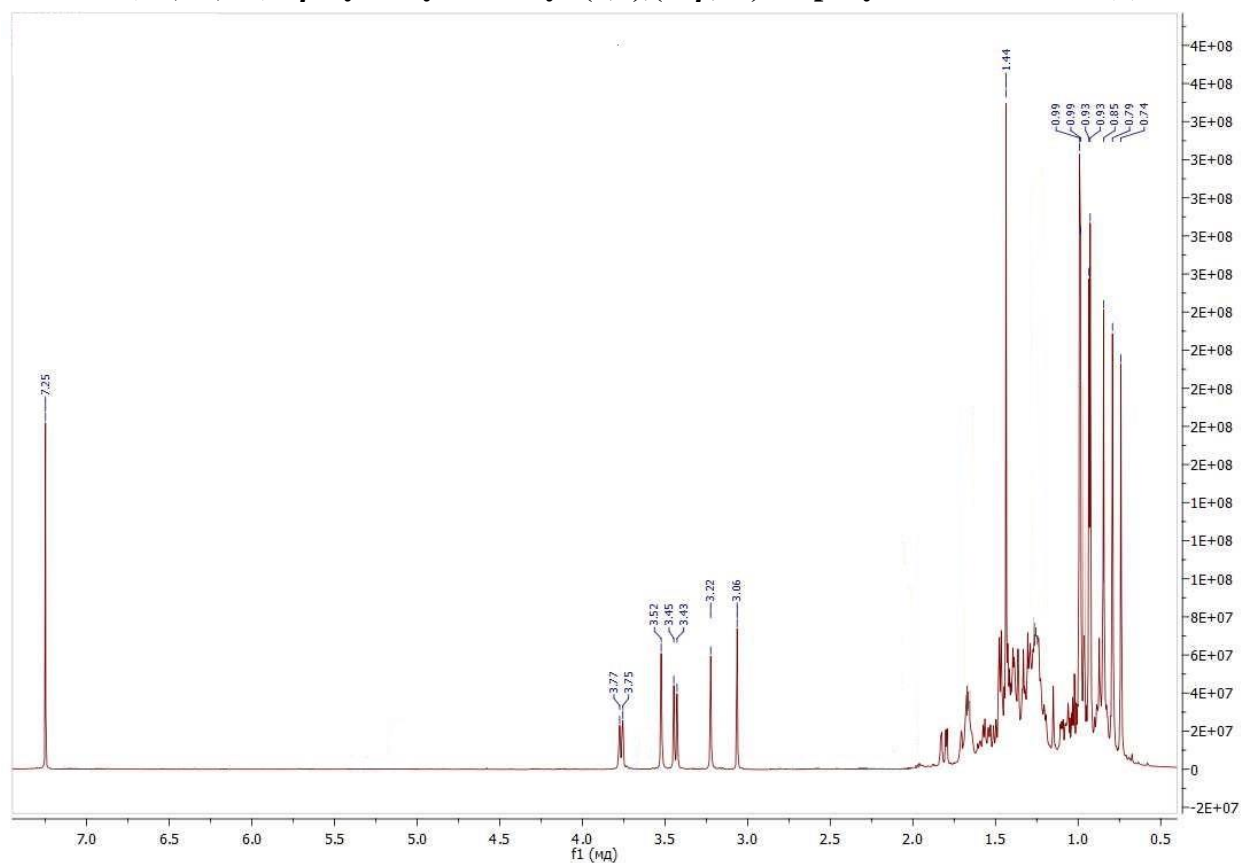

**<sup>13</sup>C NMR (CDCl<sub>3</sub>) (1*R*,2*S*,3*R*)-3β-hydroxy-2-methyl-(1,2),(19β,28)-diepoxy-18*aH*-oleanane (5)**

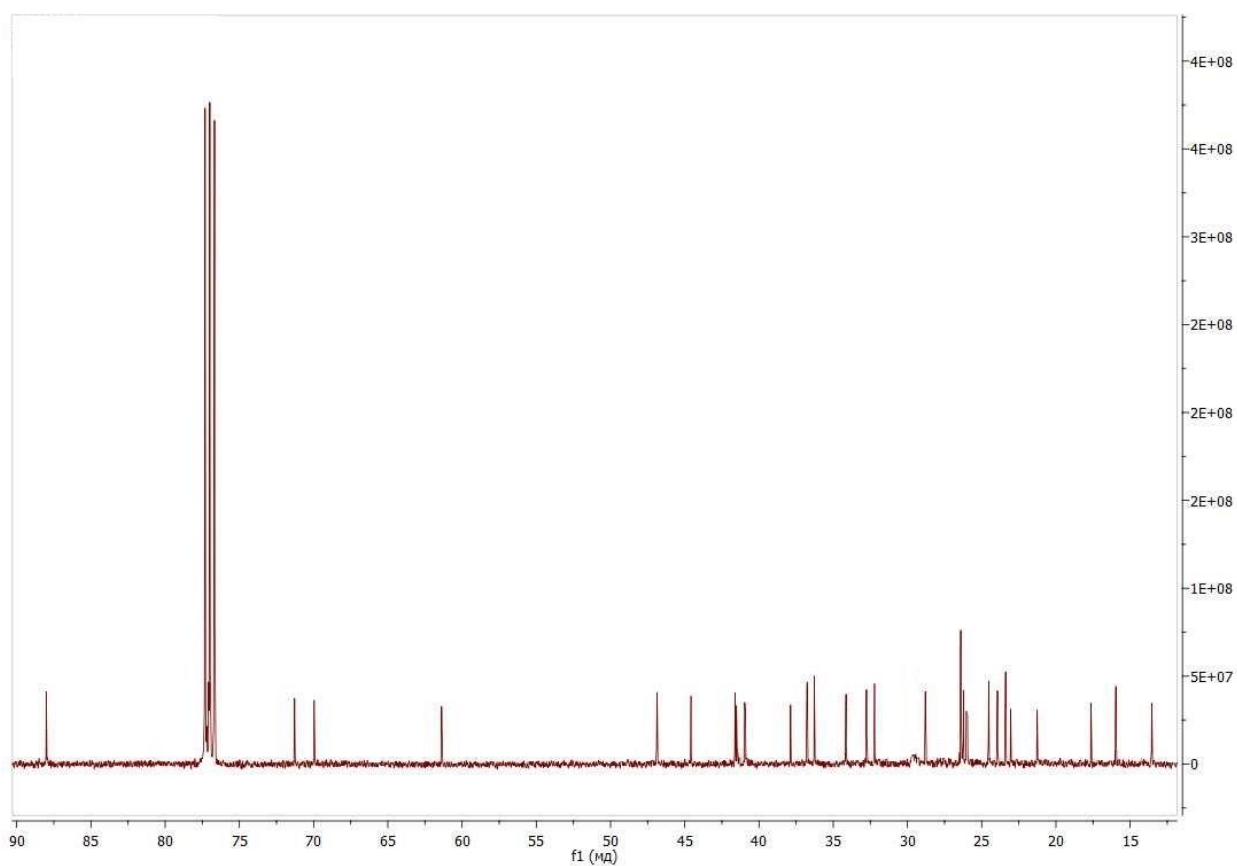

**GC-MS (1*R*,2*S*,3*R*)-3 $\beta$ -hydroxy-2-methyl-(1,2),(19 $\beta$ ,28)-diepoxy-18 $\alpha$ *H*-oleanane (5)**

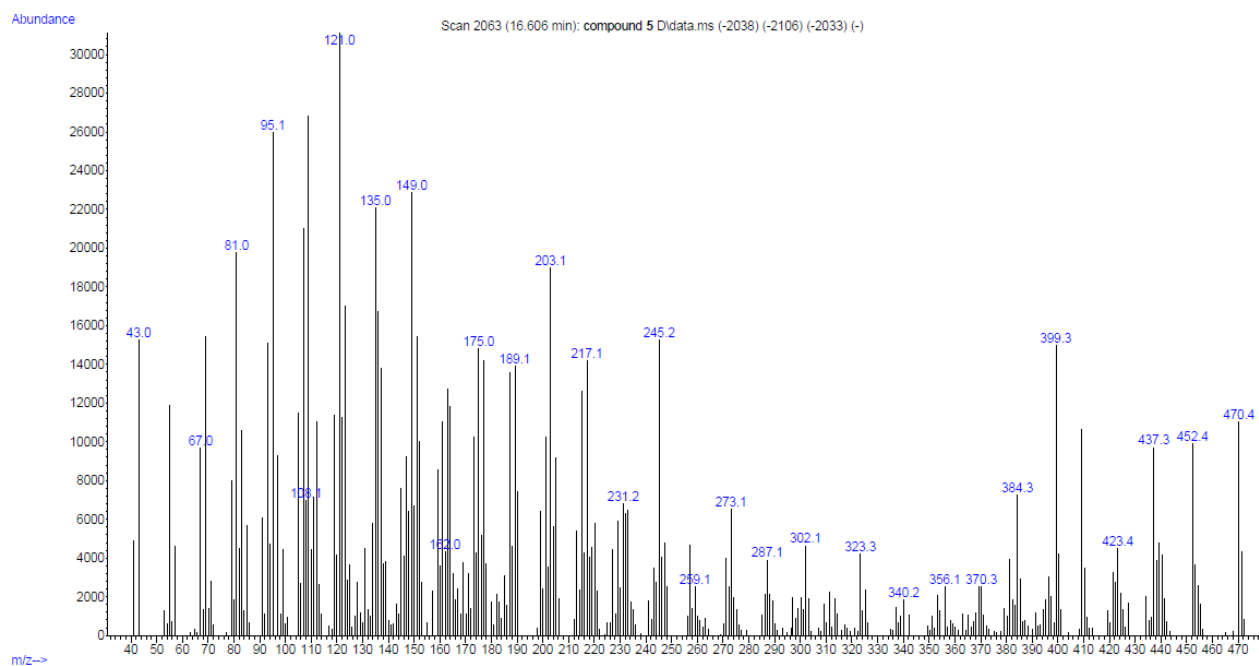

**$^1\text{H}$  NMR (1*S*,2*R*,3*R*)-3 $\beta$ -hydroxy-2-methyl-(1,2),(19 $\beta$ ,28)-diepoxy-18*aH*-oleanane (6)**

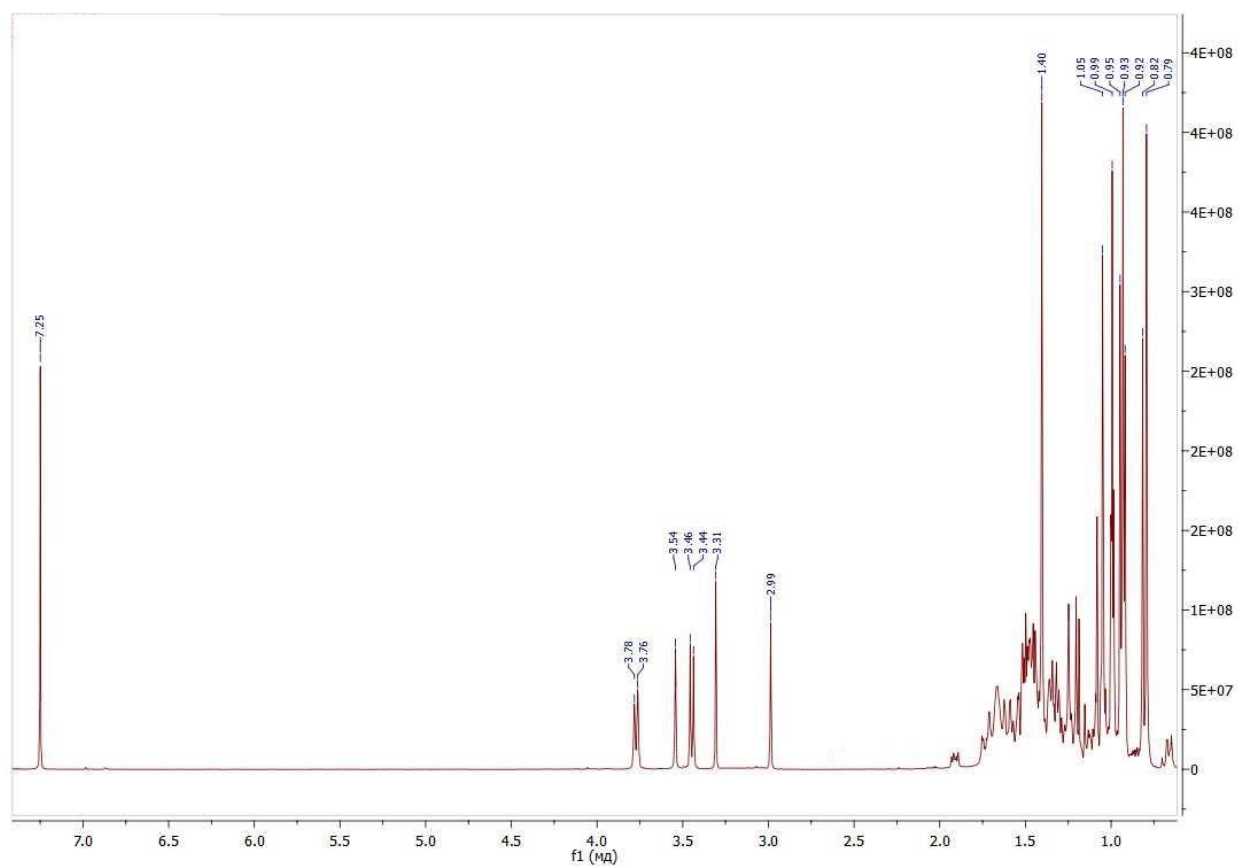

**$^{13}\text{C}$  NMR (CDCl<sub>3</sub>) (1*S*,2*R*,3*R*)-3 $\beta$ -hydroxy-2-methyl-(1,2),(19 $\beta$ ,28)-diepoxy-18*aH*-oleanane (6)**

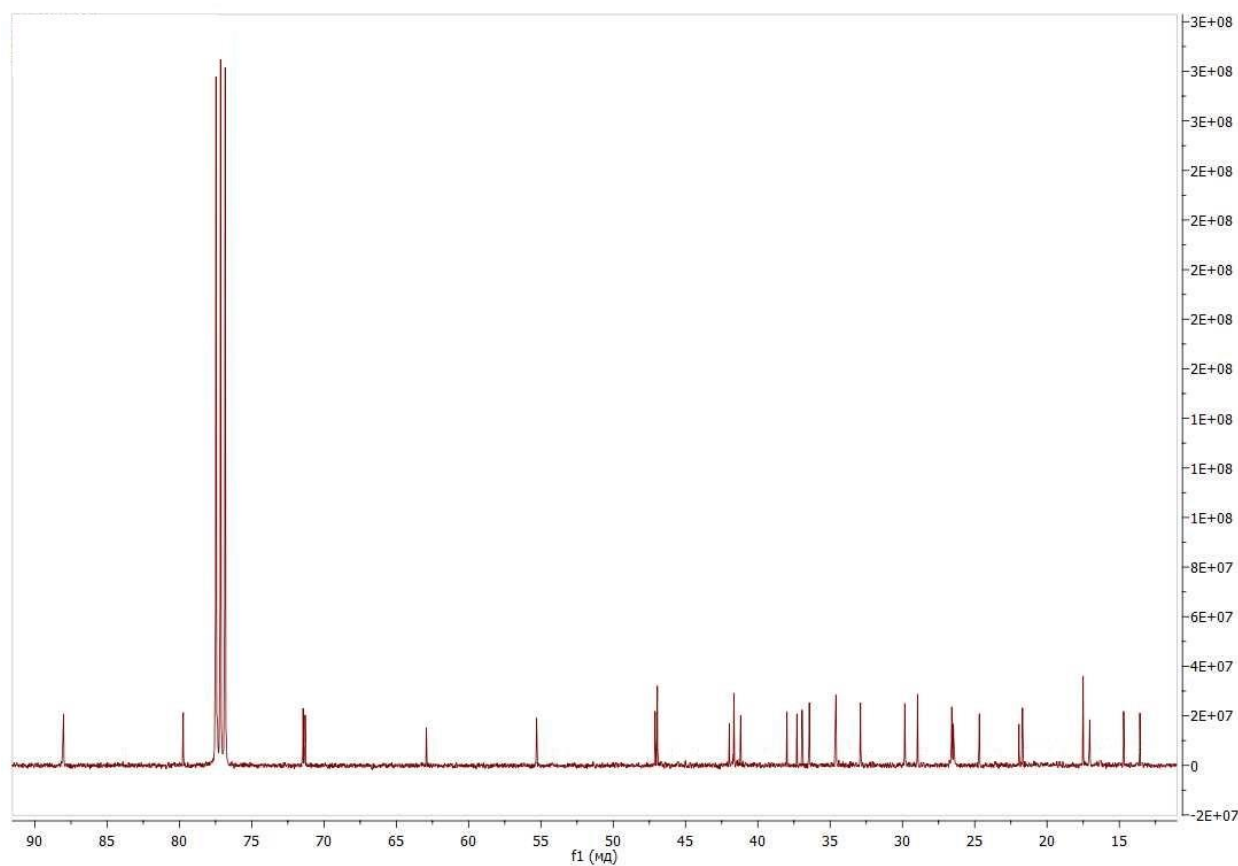

**GC-MS (1*S*,2*R*,3*R*)-3 $\beta$ -hydroxy-2-methyl-(1,2),(19 $\beta$ ,28)-diepoxy-18*aH*-oleanane (6)**

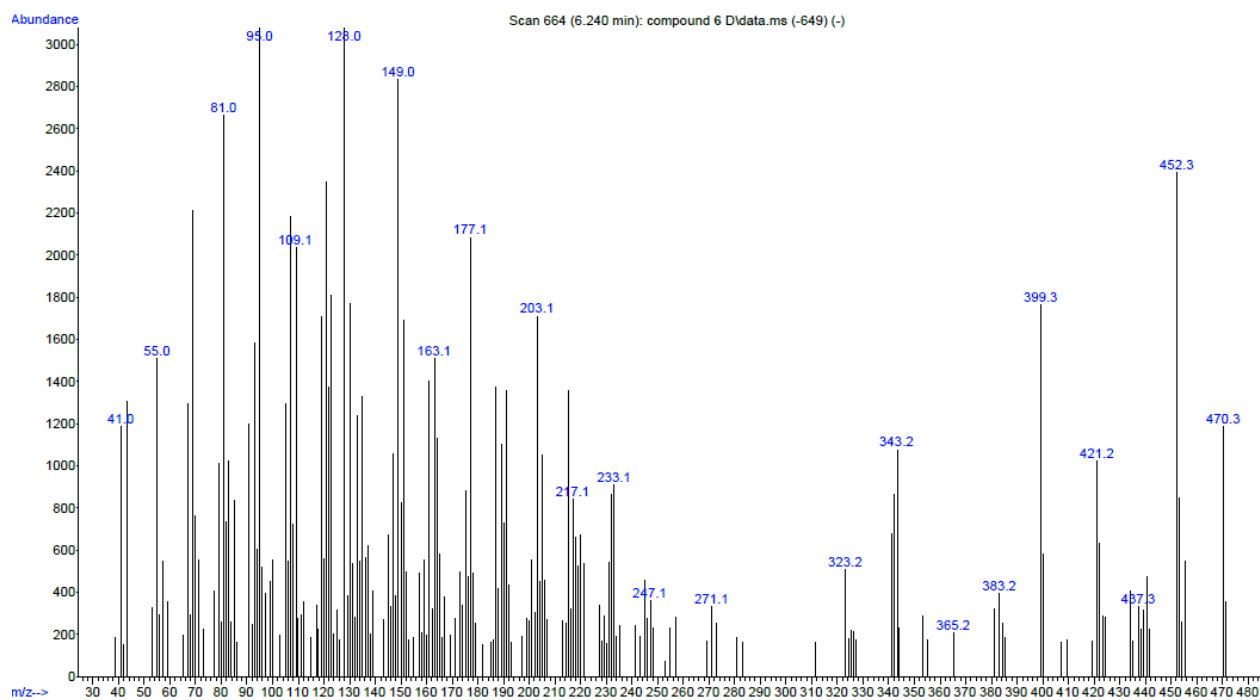

**<sup>1</sup>H NMR (3*S*)-3 $\beta$ -hydroxy-2,3-dimethyl-19 $\beta$ ,28-epoxy-18*aH*-olean-1-ene (7)**

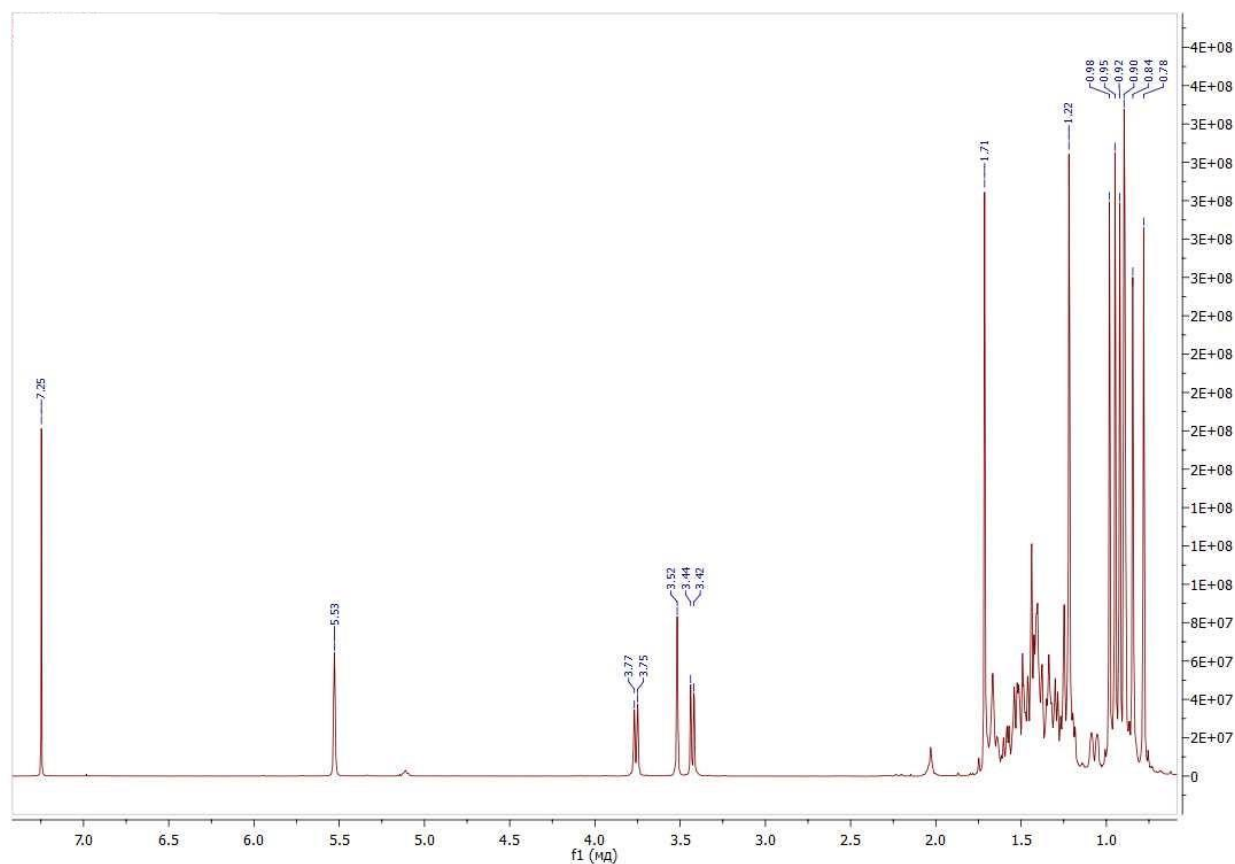

**<sup>13</sup>C NMR (CDCl<sub>3</sub>) (3*S*)-3 $\beta$ -hydroxy-2,3-dimethyl-19 $\beta$ ,28-epoxy-18*aH*-olean-1-ene (7)**

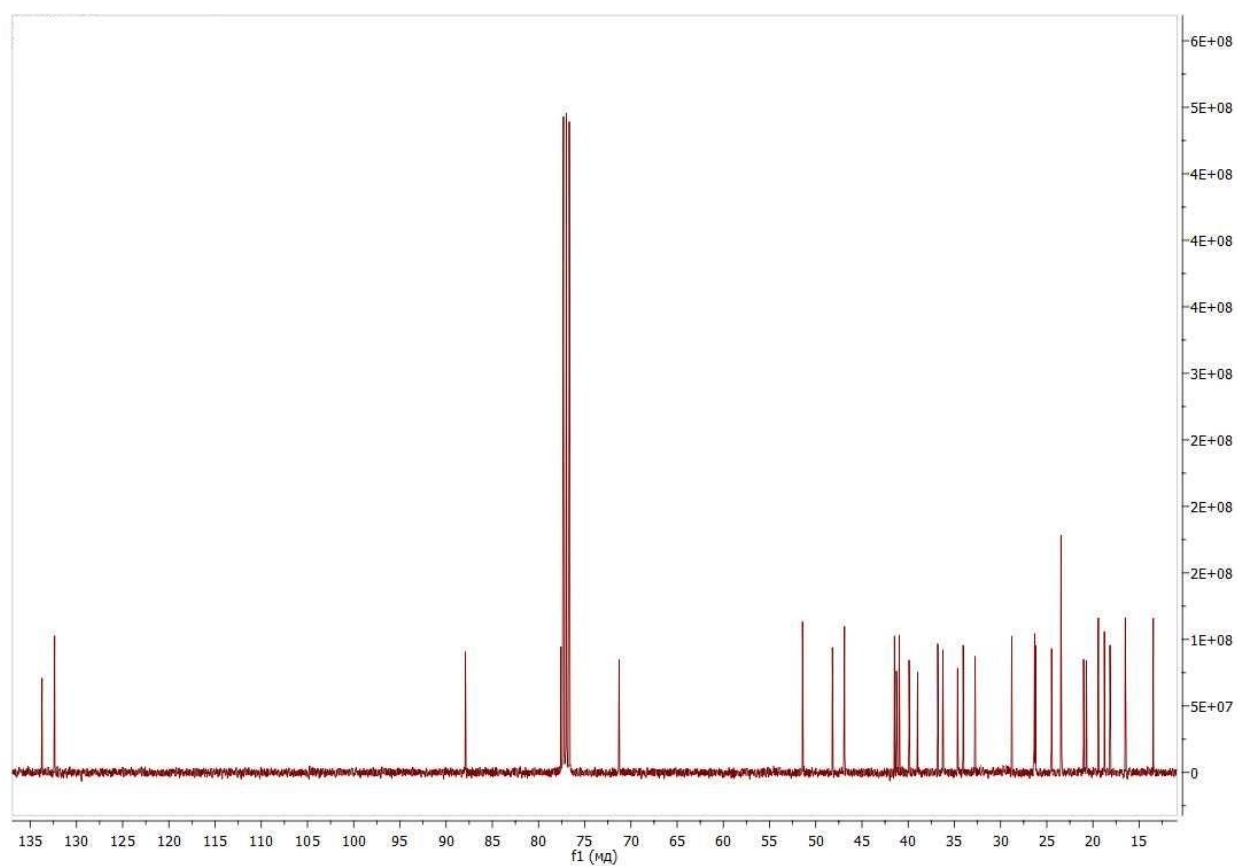

### GC-MS (3S)-3 $\beta$ -hydroxy-2,3-dimethyl-19 $\beta$ ,28-epoxy-18 $\alpha$ H-olean-1-ene (7)

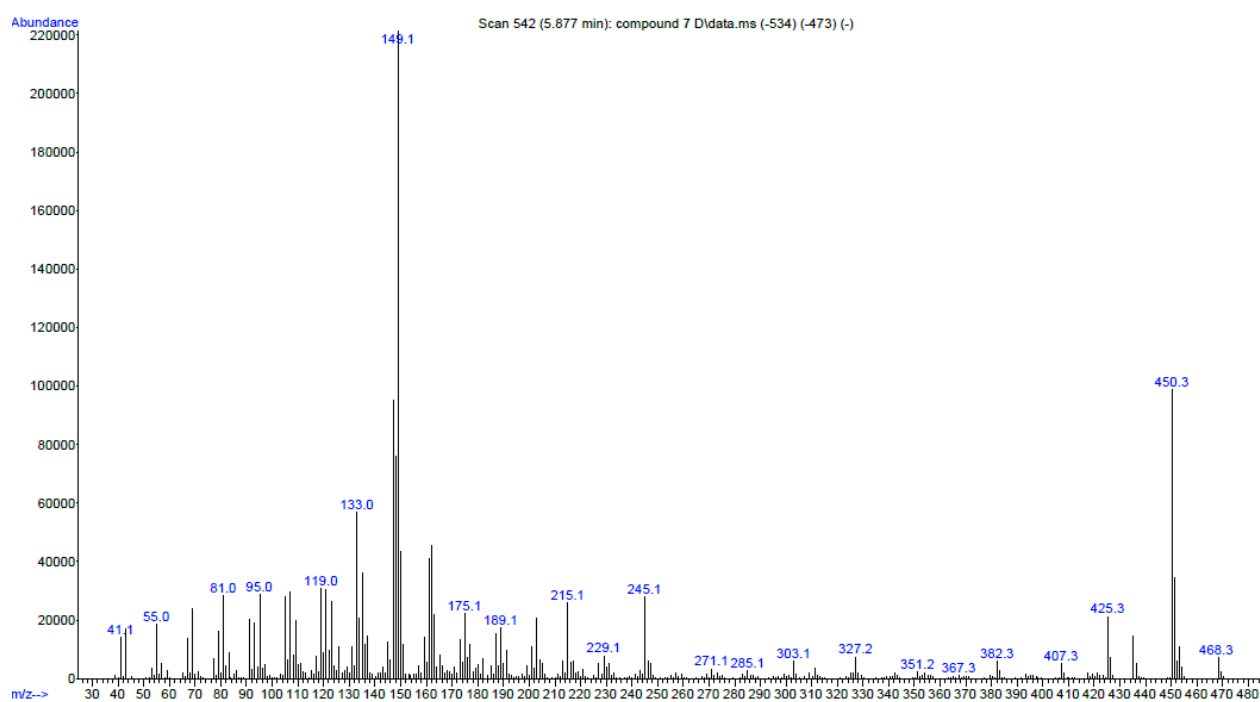

### $^1\text{H}$ NMR (3S)-3-ethyl-3 $\beta$ -hydroxy-2-methyl-19 $\beta$ ,28-epoxy-18 $\alpha$ H-olean-1-ene (8)



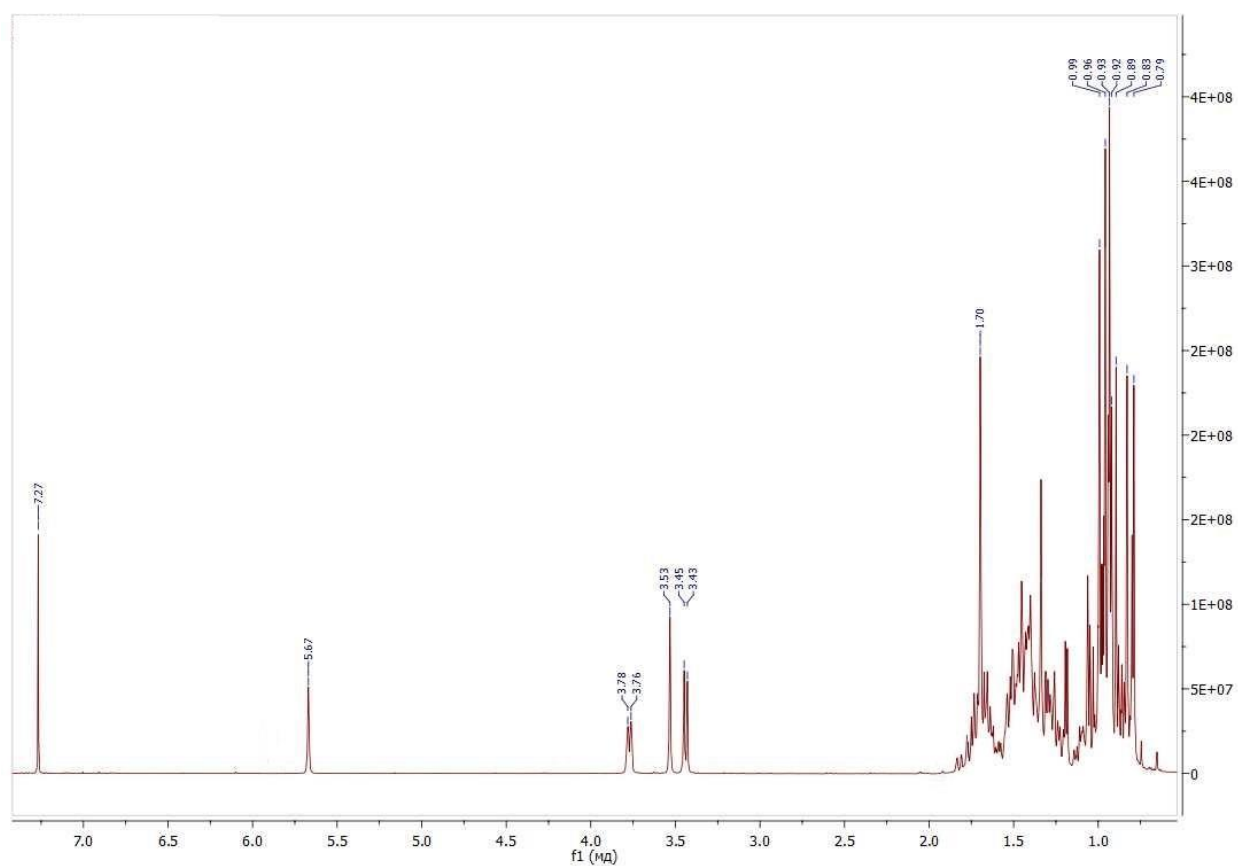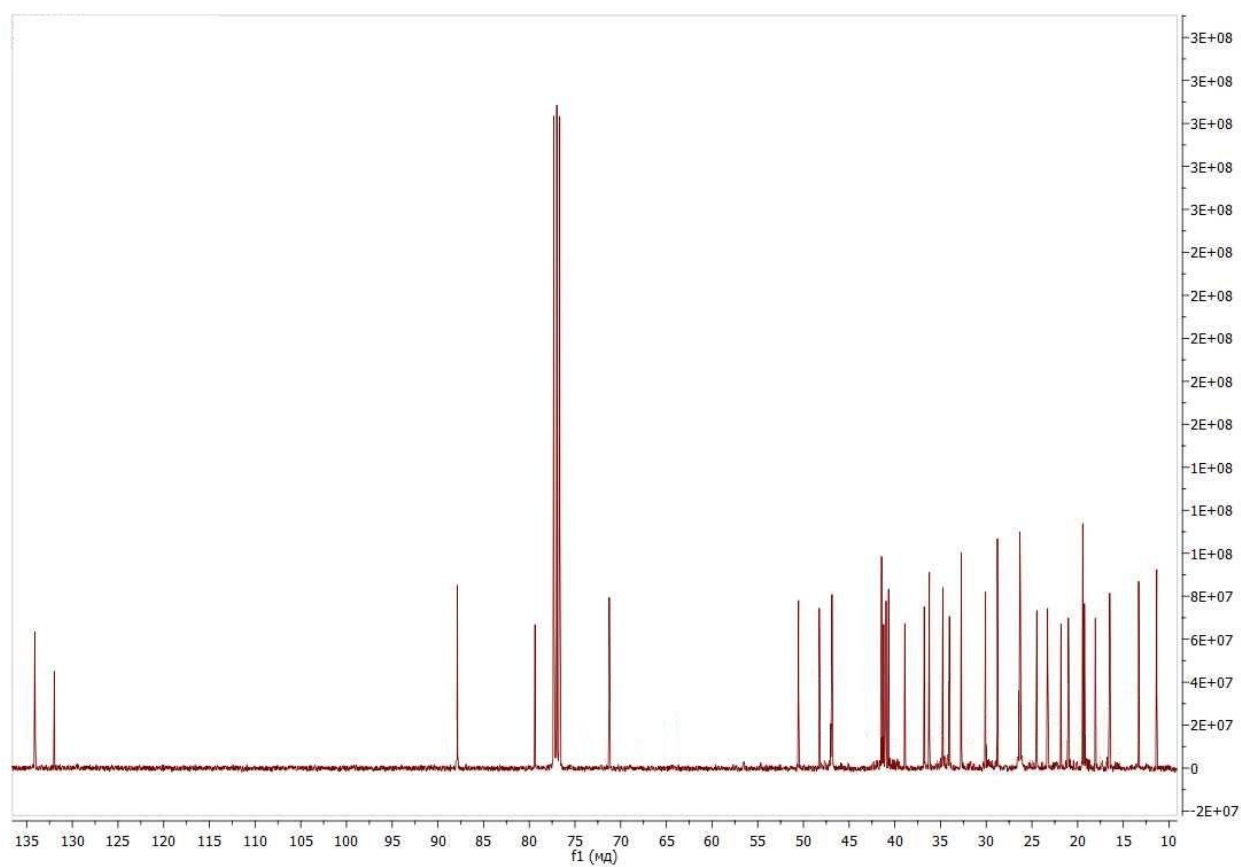

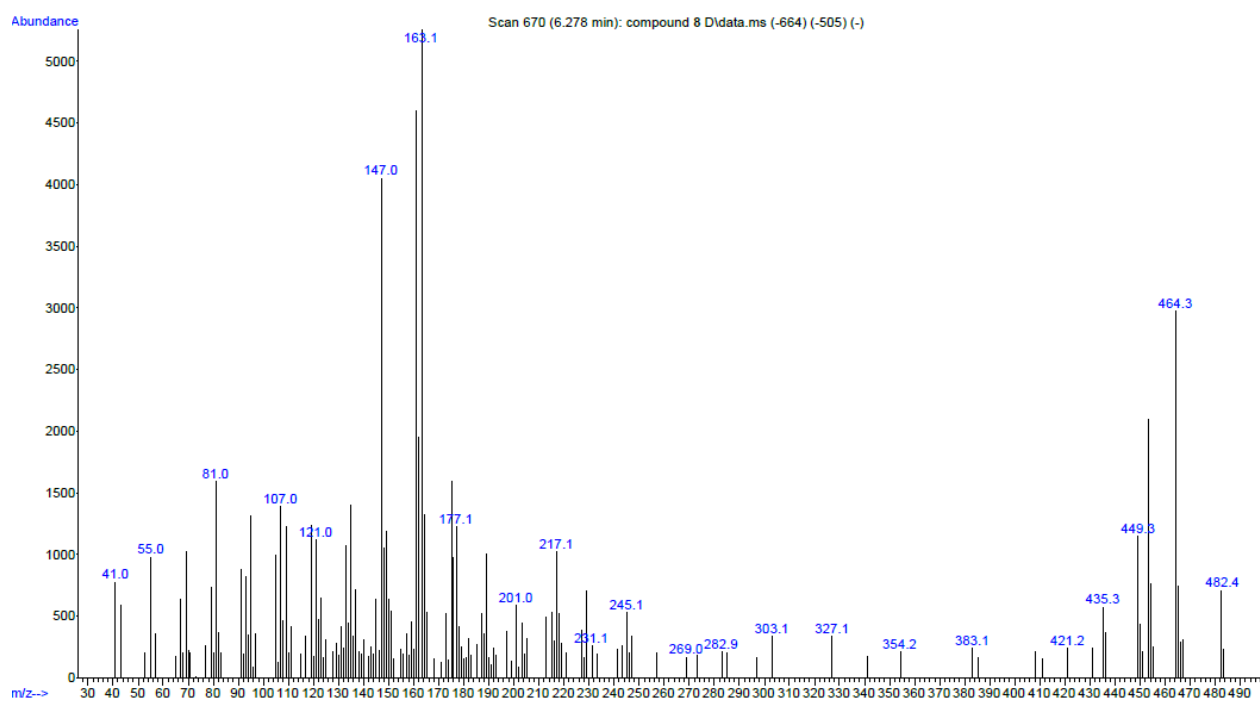

$^1\text{H}$  NMR (3*R*)-3 $\beta$ -hydroxy-2-methyl-3-phenyl-19 $\beta$ ,28-epoxy-18*aH*-olean-1-ene (9)

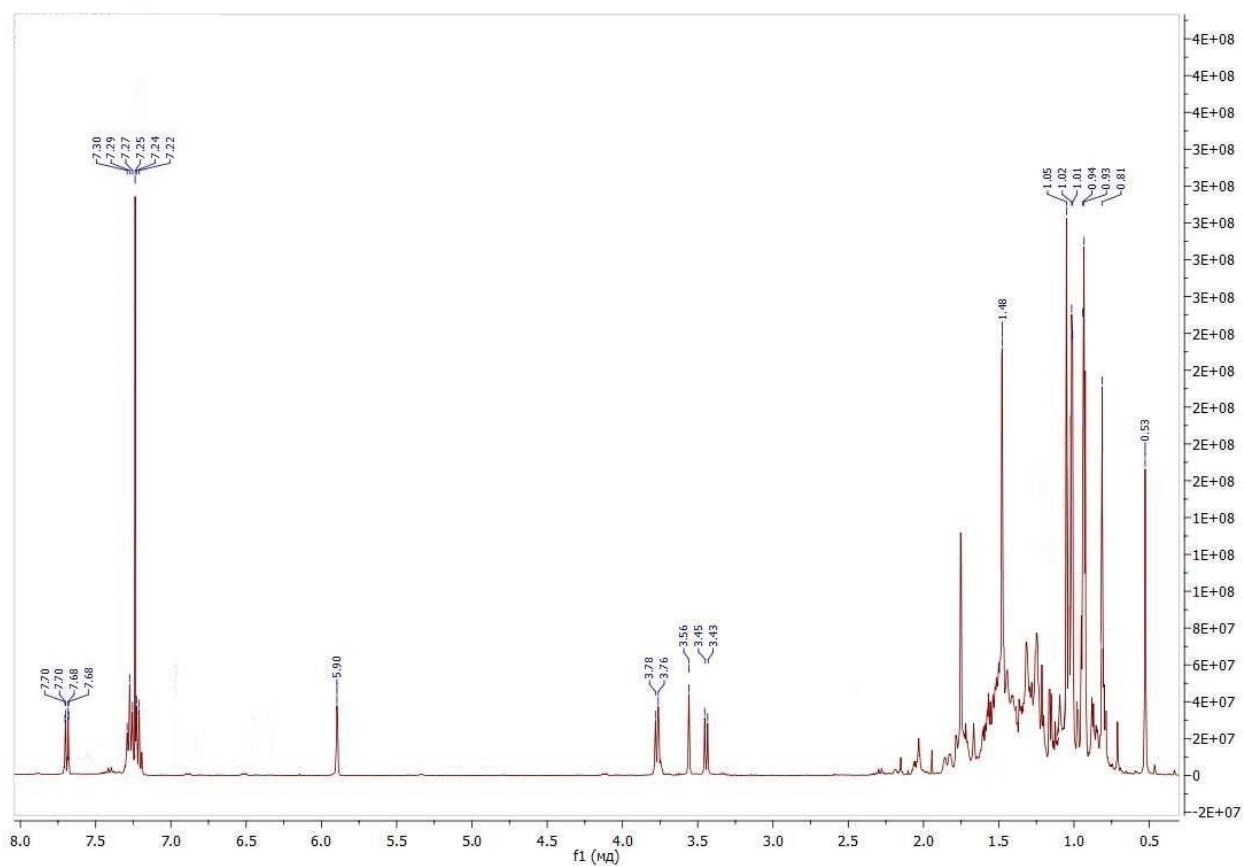

$^{13}\text{C}$  NMR ( $\text{CDCl}_3$ ) (3*R*)-3 $\beta$ -hydroxy-2-methyl-3-phenyl-19 $\beta$ ,28-epoxy-18*aH*-olean-1-ene (9)

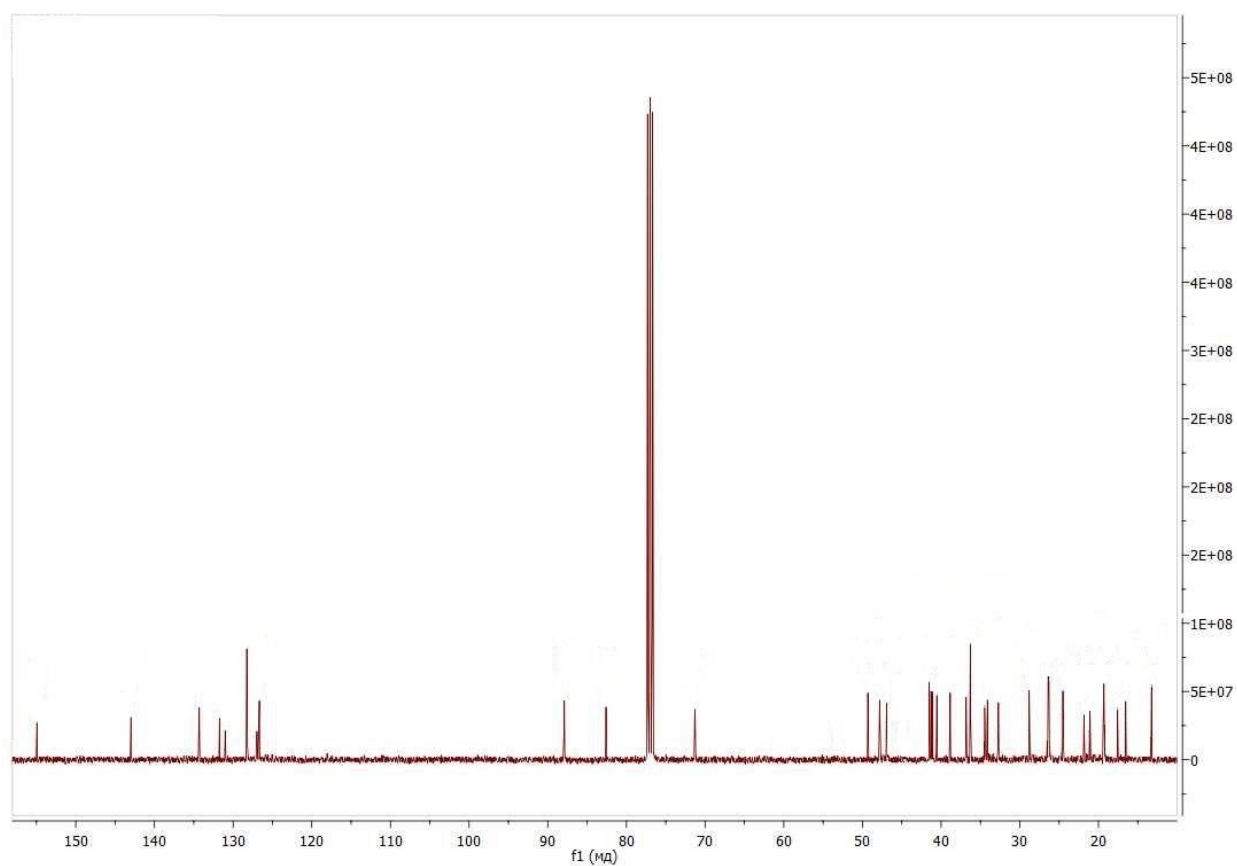

# **GC-MS (3*R*)-3 $\beta$ -hydroxy-2-methyl-3-phenyl-19 $\beta$ ,28-epoxy-18*a**H*-olean-1-ene (9)**

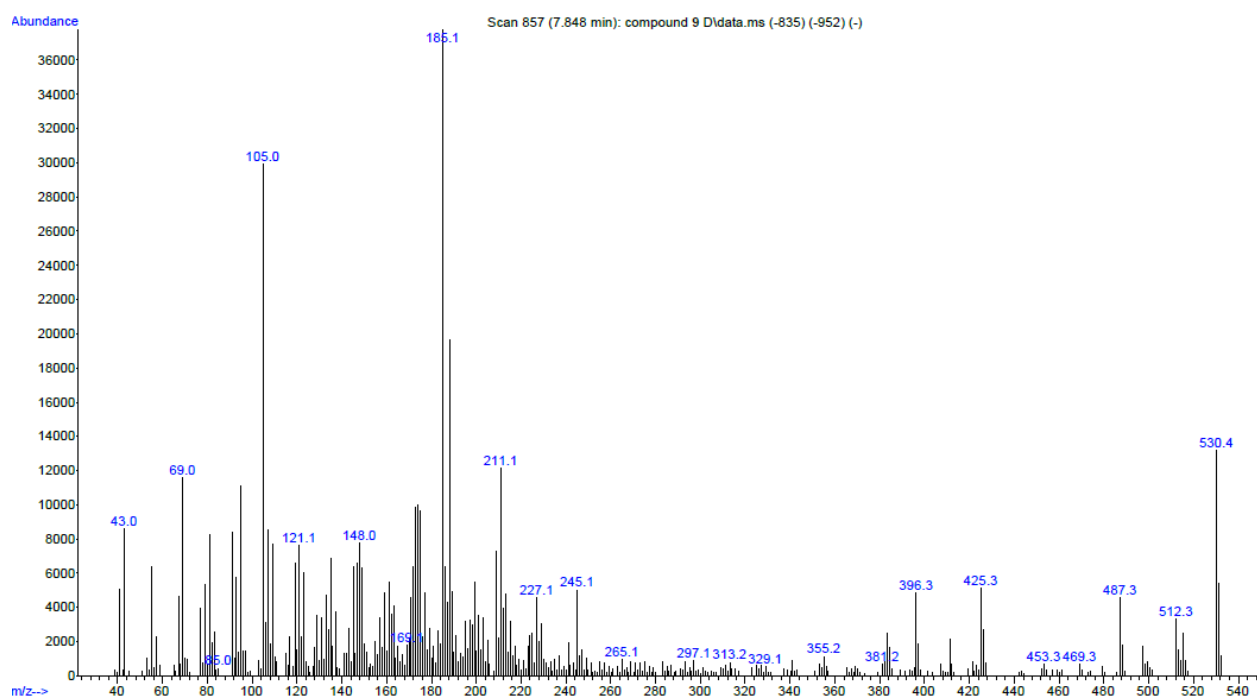

**$^1\text{H}$  NMR (1*S*,2*S*,3*R*)-3 $\beta$ -hydroxy-2,3-dimethyl-(1,2),(19 $\beta$ ,28)-diepoxy-18*aH*-oleanane (10)**

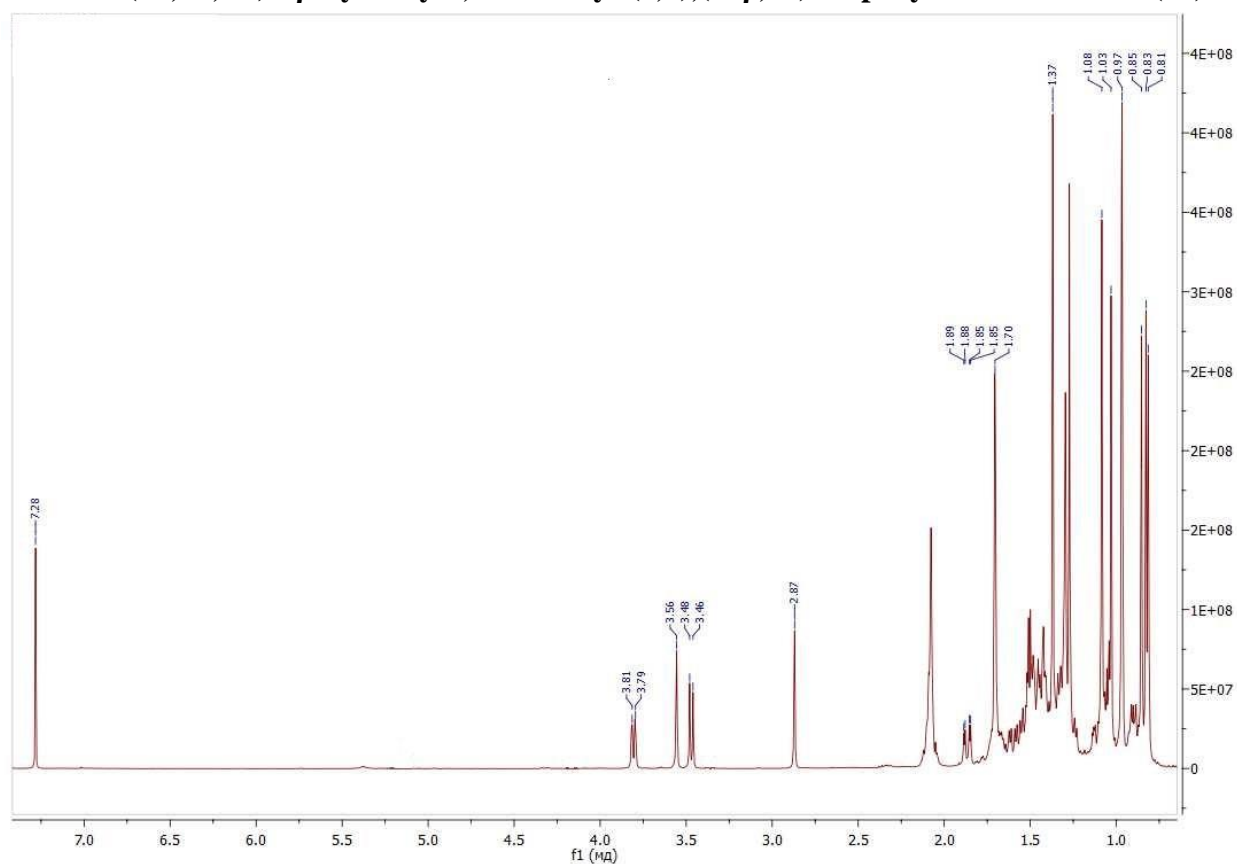

**$^{13}\text{C}$  NMR ( $\text{CDCl}_3$ ) (1*S*,2*S*,3*R*)-3 $\beta$ -hydroxy-2,3-dimethyl-(1,2),(19 $\beta$ ,28)-diepoxy-18*aH*-oleanane (10)**

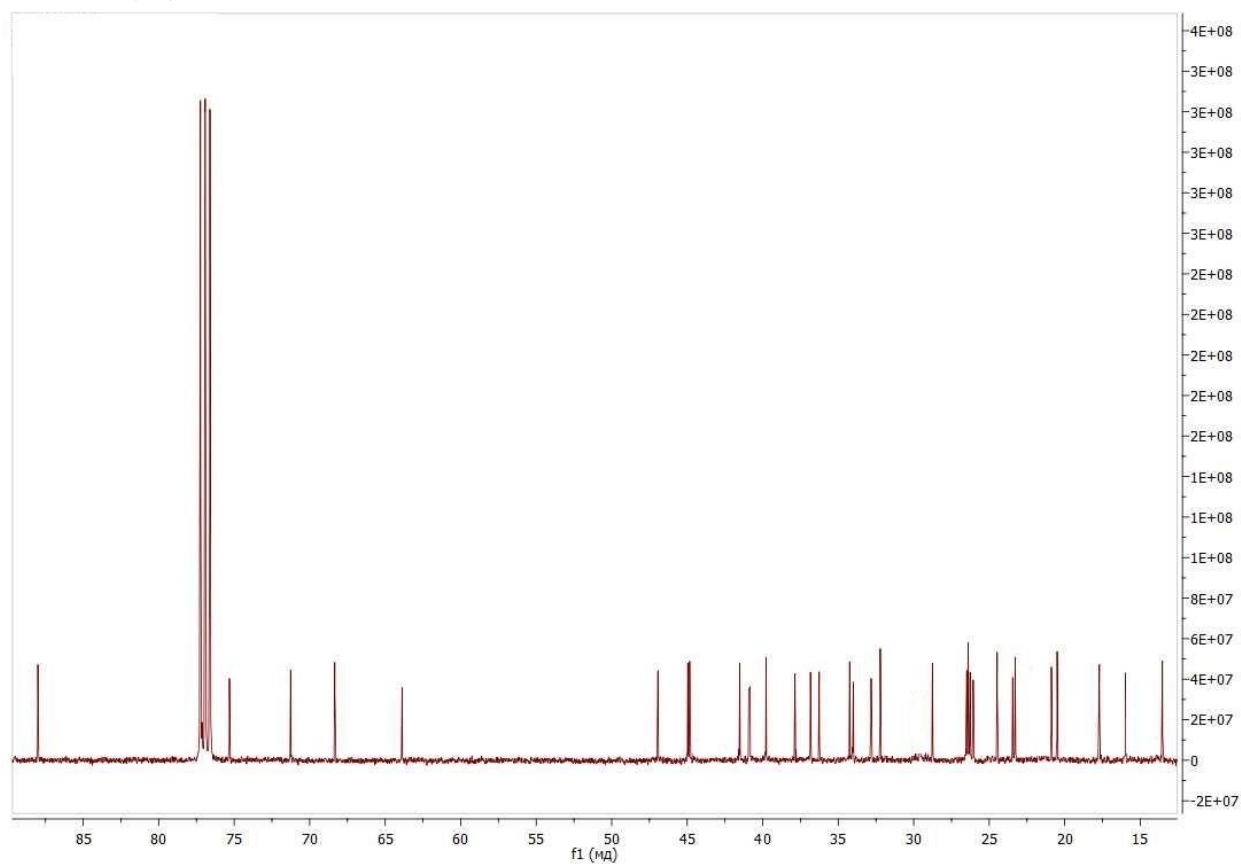

**$^1\text{H}$ - $^1\text{H}$  COSY ( $\text{CDCl}_3$ ) (1*S*,2*S*,3*R*)-3 $\beta$ -hydroxy-2,3-dimethyl-(1,2),(19 $\beta$ ,28)-diepoxy-18*aH*-oleanane (10)**

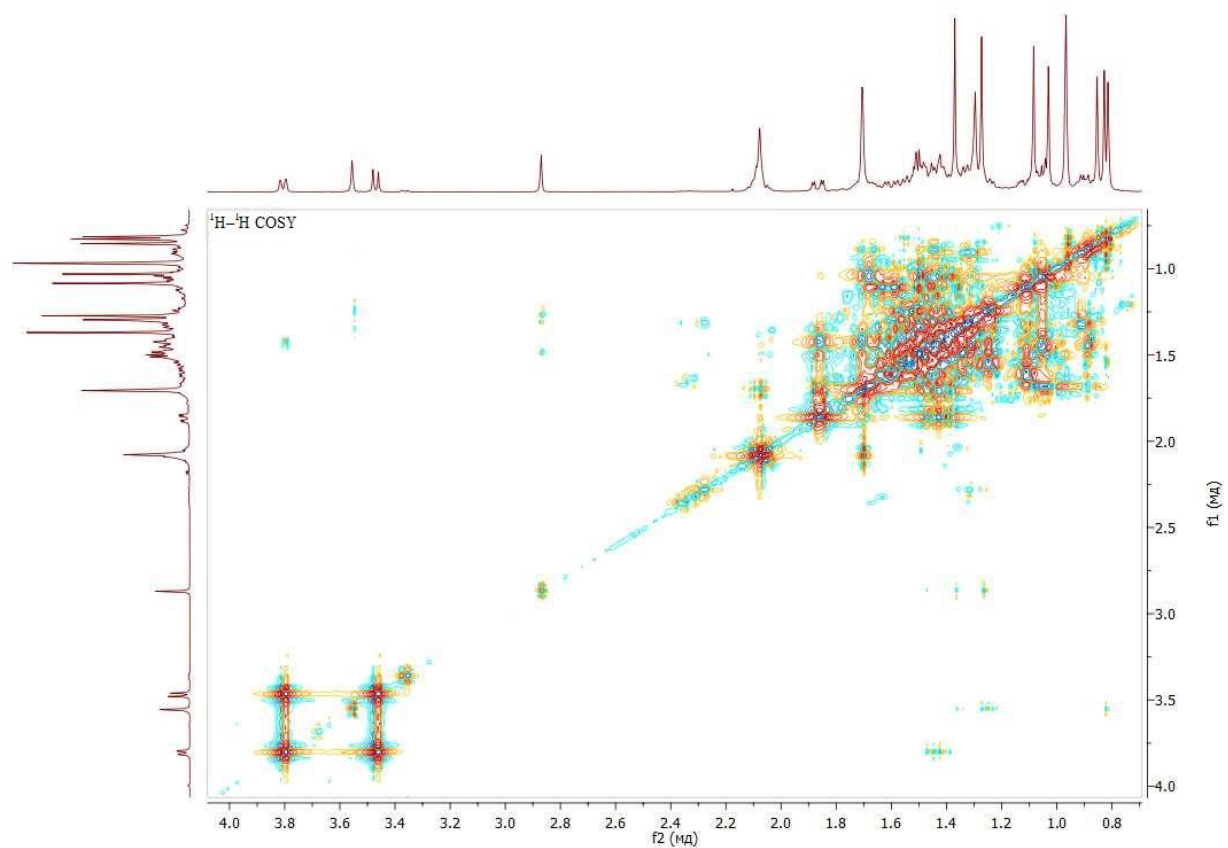

**NOESY (CDCl<sub>3</sub>) (1*S*,2*S*,3*R*)-3 $\beta$ -hydroxy-2,3-dimethyl-(1,2),(19 $\beta$ ,28)-diepoxy-18 $\alpha$ *H*-oleanane (10)**

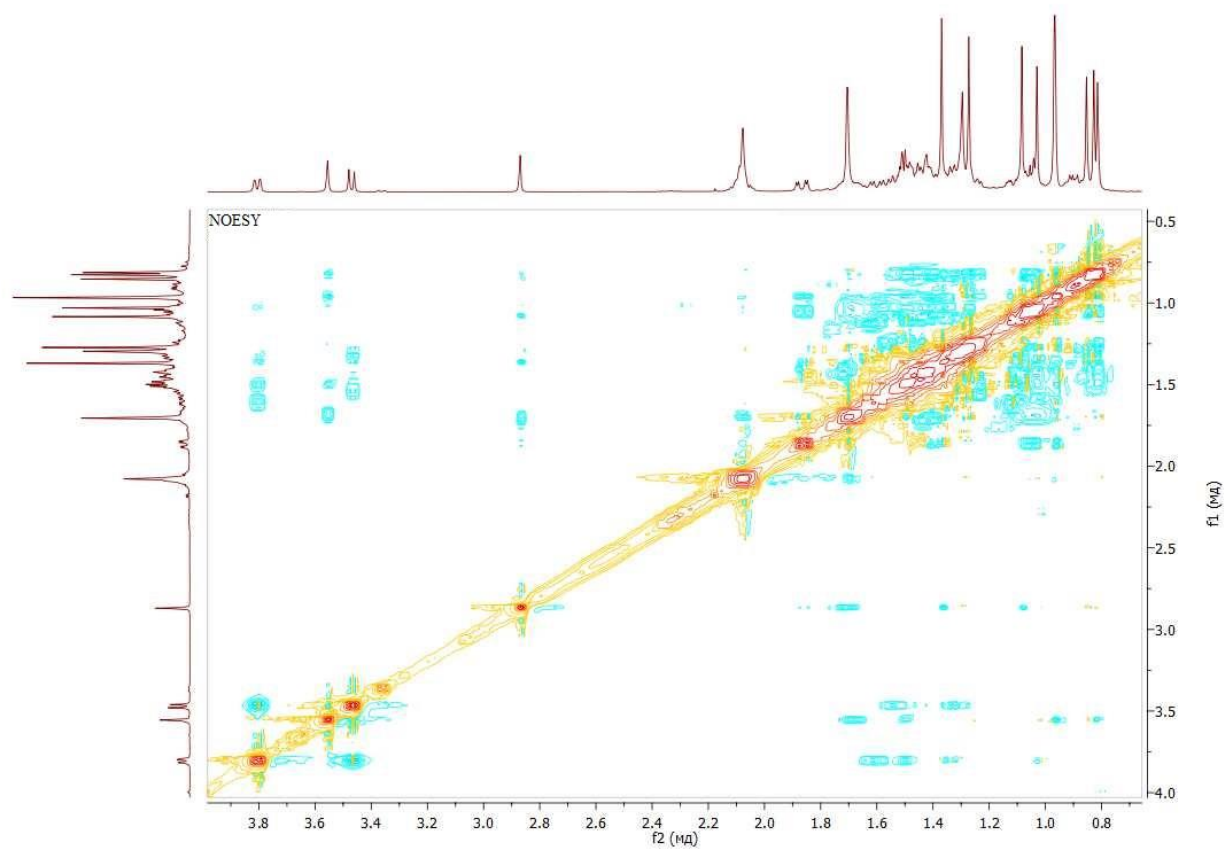

**HMBC (CDCl<sub>3</sub>) (1*S*,2*S*,3*R*)-3 $\beta$ -hydroxy-2,3-dimethyl-(1,2),(19 $\beta$ ,28)-diepoxy-18 $\alpha$ *H*-oleanane (10)**

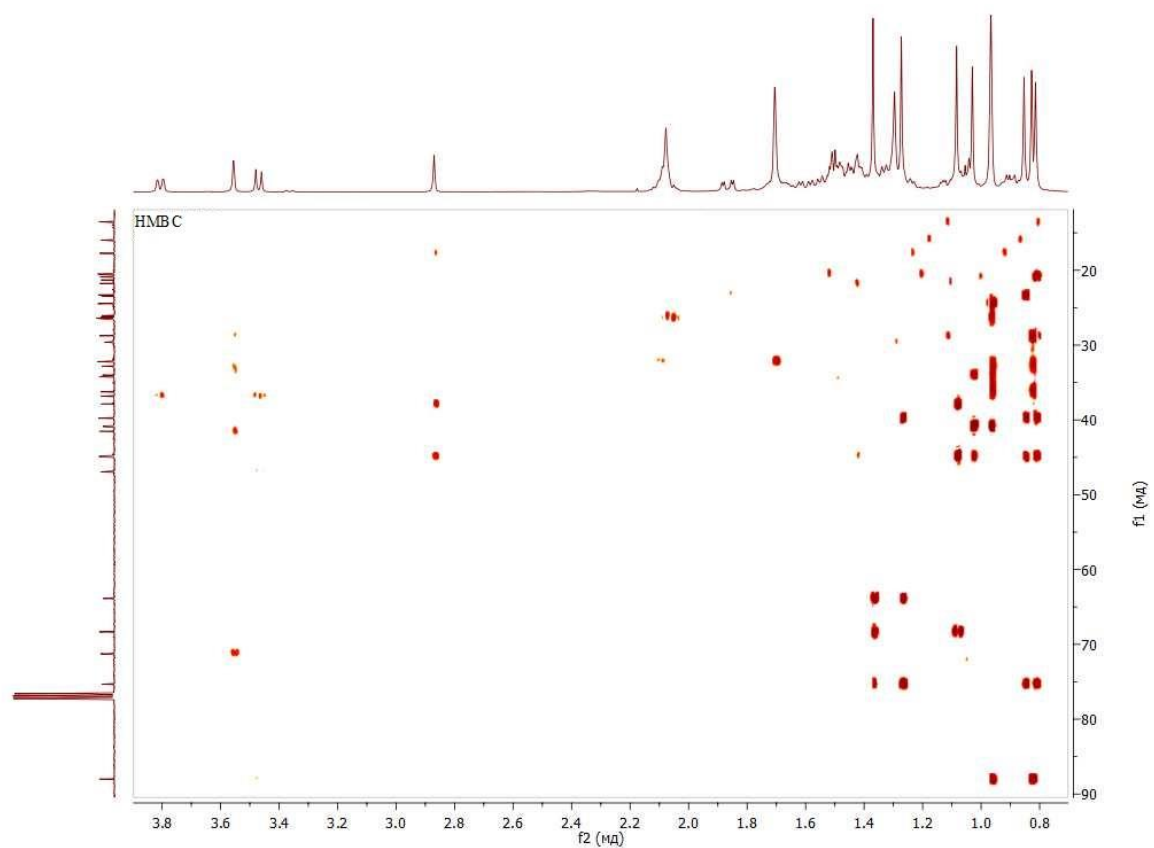

**HSQC (CDCl<sub>3</sub>) (1*S*,2*S*,3*R*)-3β-hydroxy-2,3-dimethyl-(1,2),(19β,28)-diepoxy-18α*H*-oleanane (10)**

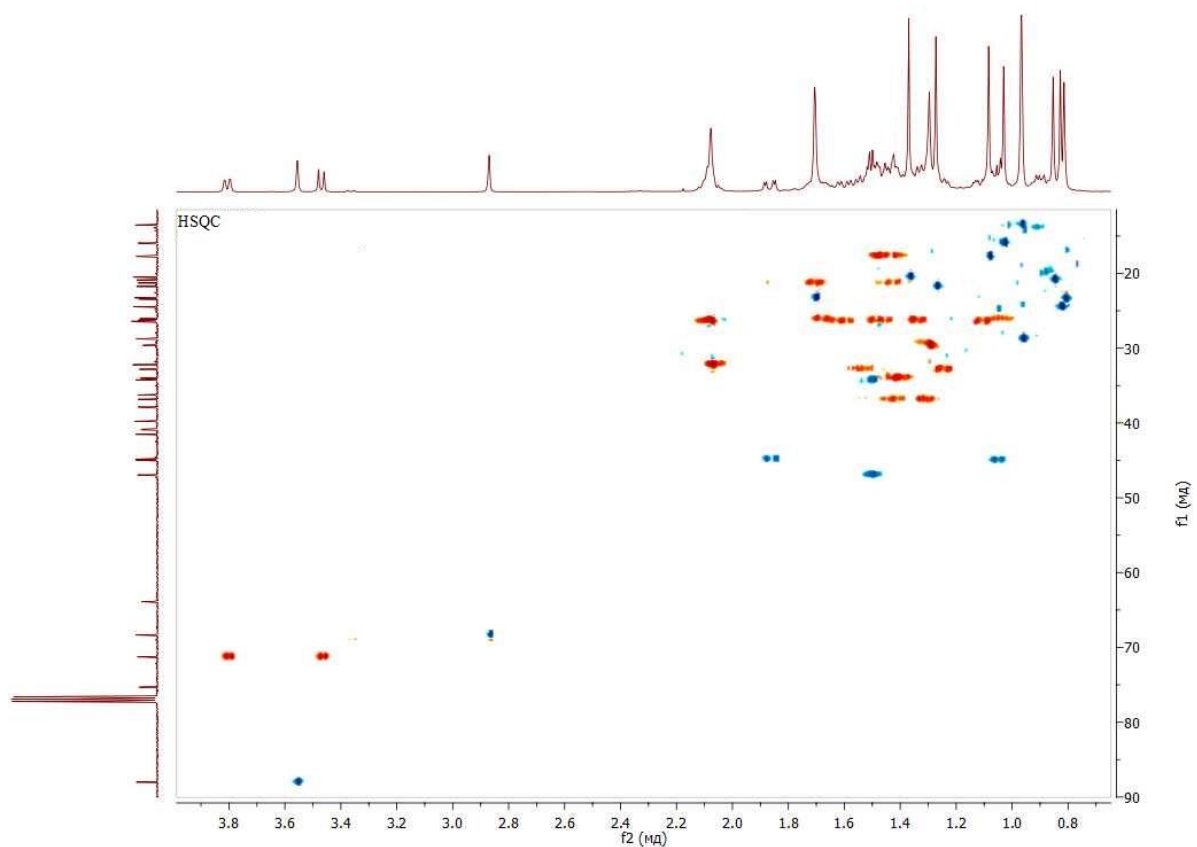

**GC-MS (1*S*,2*S*,3*R*)-3β-hydroxy-2,3-dimethyl-(1,2),(19β,28)-diepoxy-18α*H*-oleanane (10)**

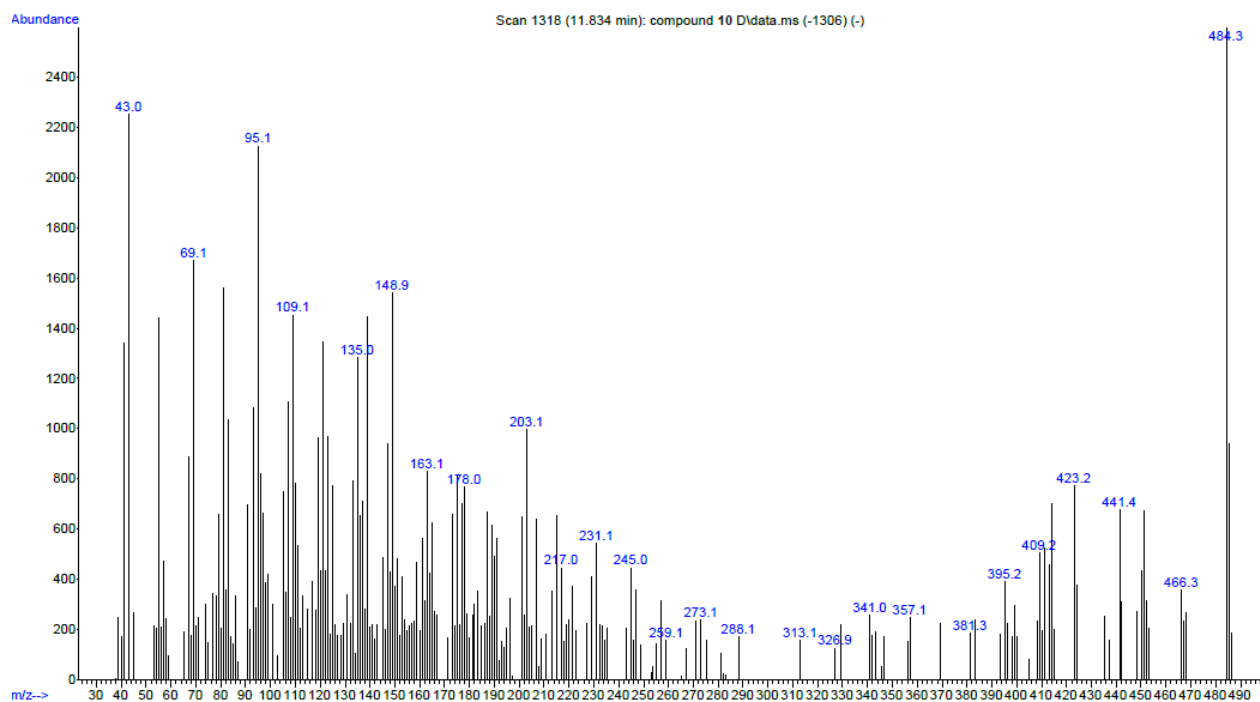

**$^1\text{H}$  NMR (1*S*,2*S*,3*R*)-3-ethyl-3 $\beta$ -hydroxy-2-methyl-(1,2),(19 $\beta$ ,28)-diepoxy-18*aH*-oleanane (11)**

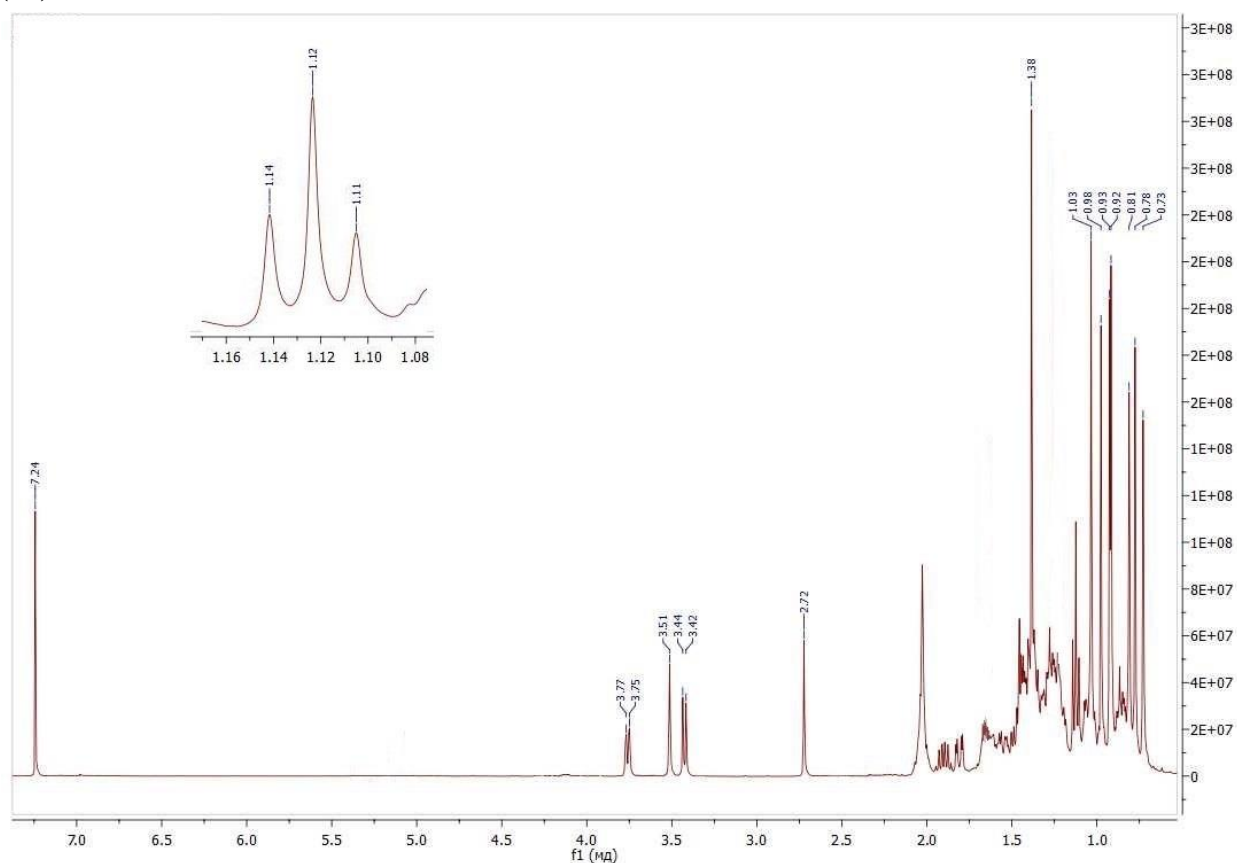

**$^{13}\text{C}$  NMR ( $\text{CDCl}_3$ ) (1*S*,2*S*,3*R*)-3-ethyl-3 $\beta$ -hydroxy-2-methyl-(1,2),(19 $\beta$ ,28)-diepoxy-18*aH*-oleanane (11)**

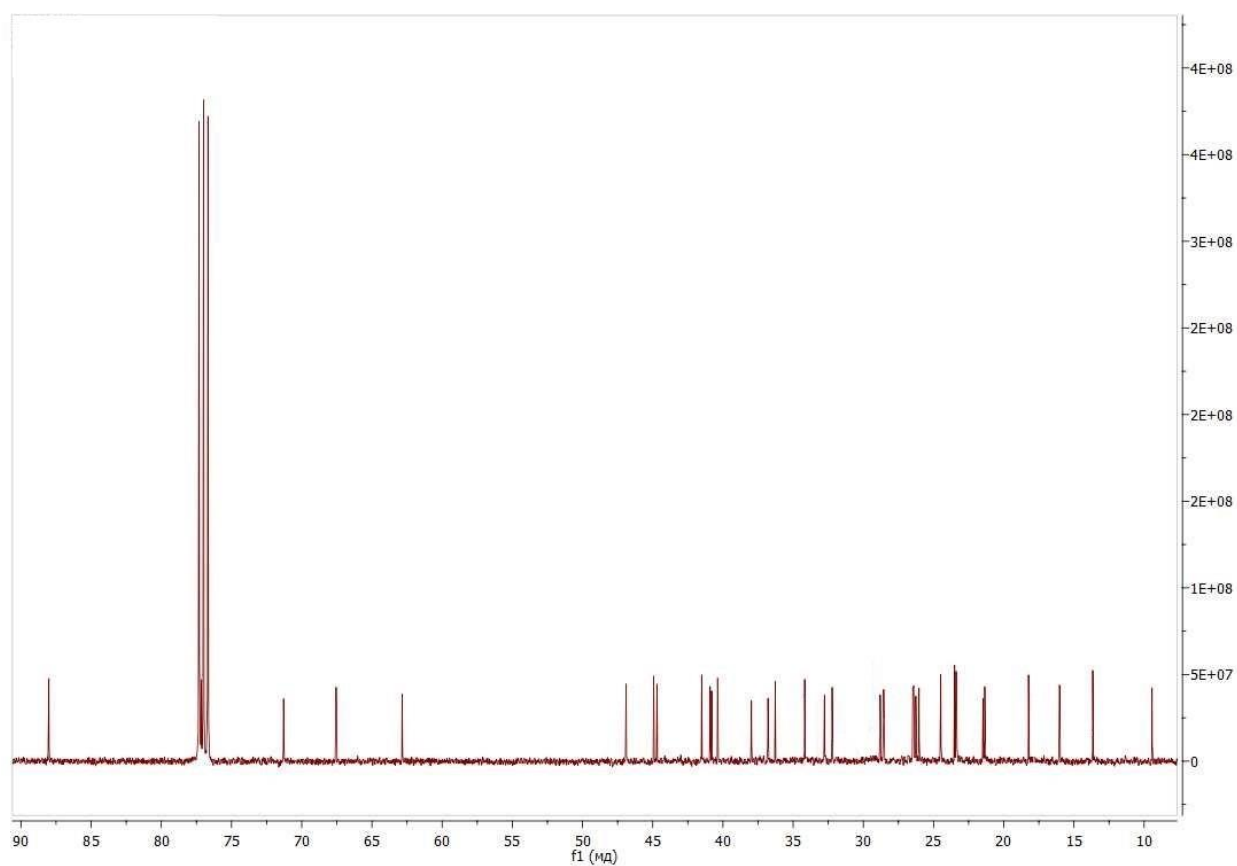

**GC-MS (1*S*,2*S*,3*R*)-3-ethyl-3 $\beta$ -hydroxy-2-methyl-(1,2),(19 $\beta$ ,28)-diepoxy-18 $\alpha$ *H*-oleanane (11)**

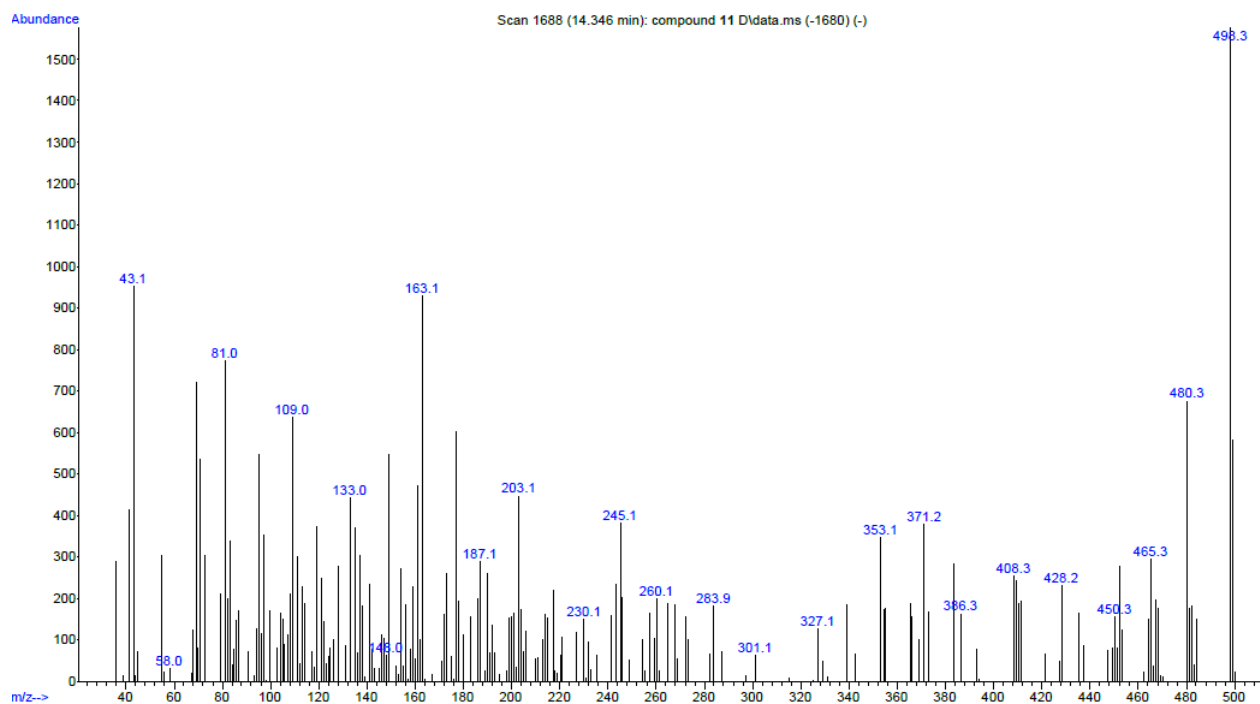

**$^1\text{H}$  NMR (1*S*,2*S*,3*R*)-3 $\beta$ -hydroxy-2-methyl-3-phenyl-(1,2),(19 $\beta$ ,28)-diepoxy-18 $\alpha$ *H*-oleanane (12)**



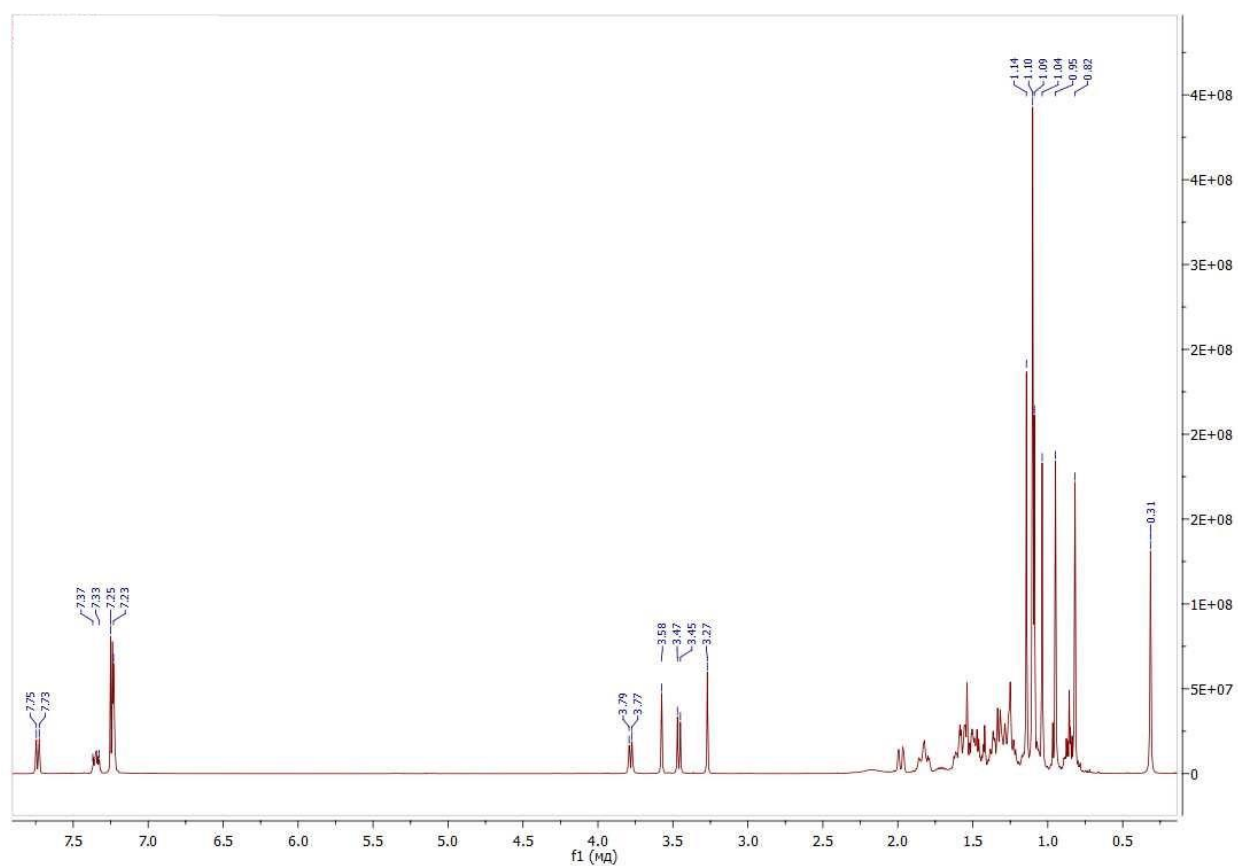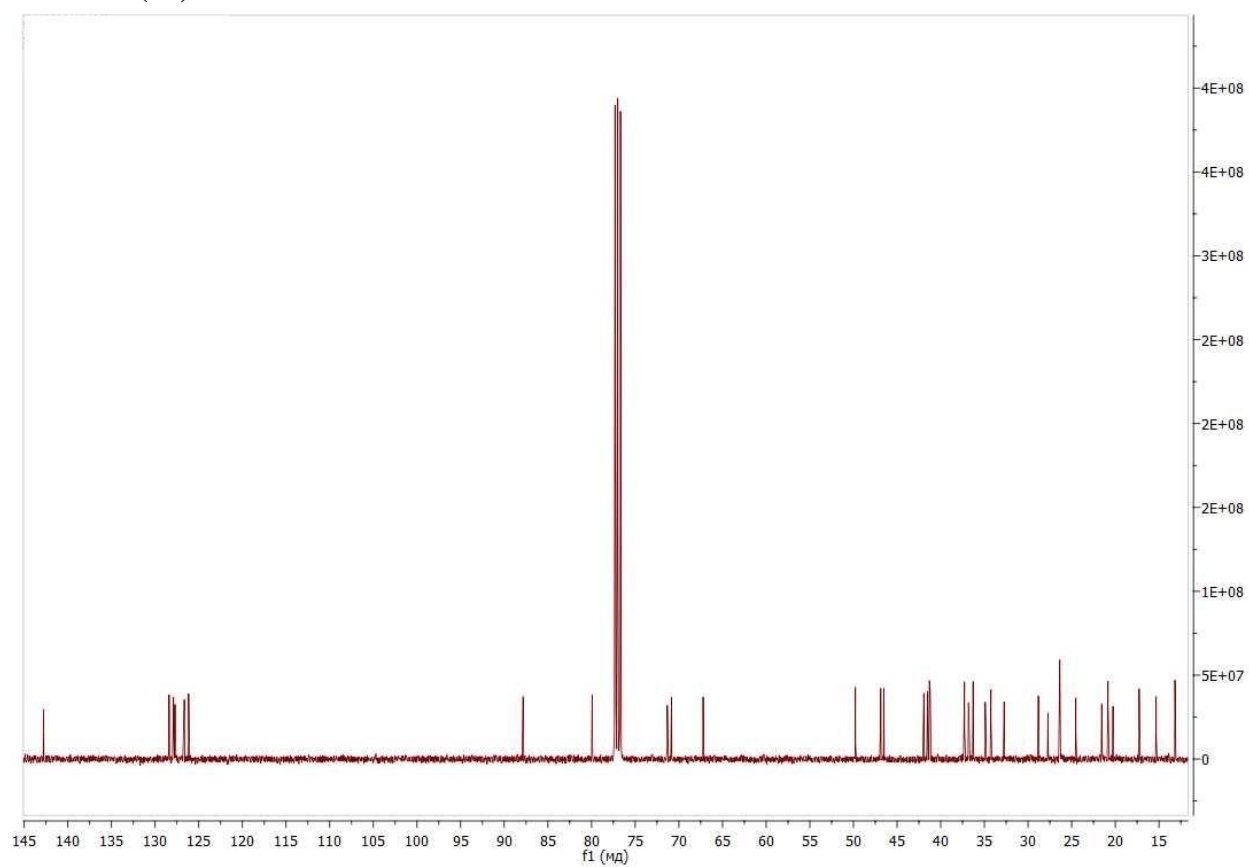

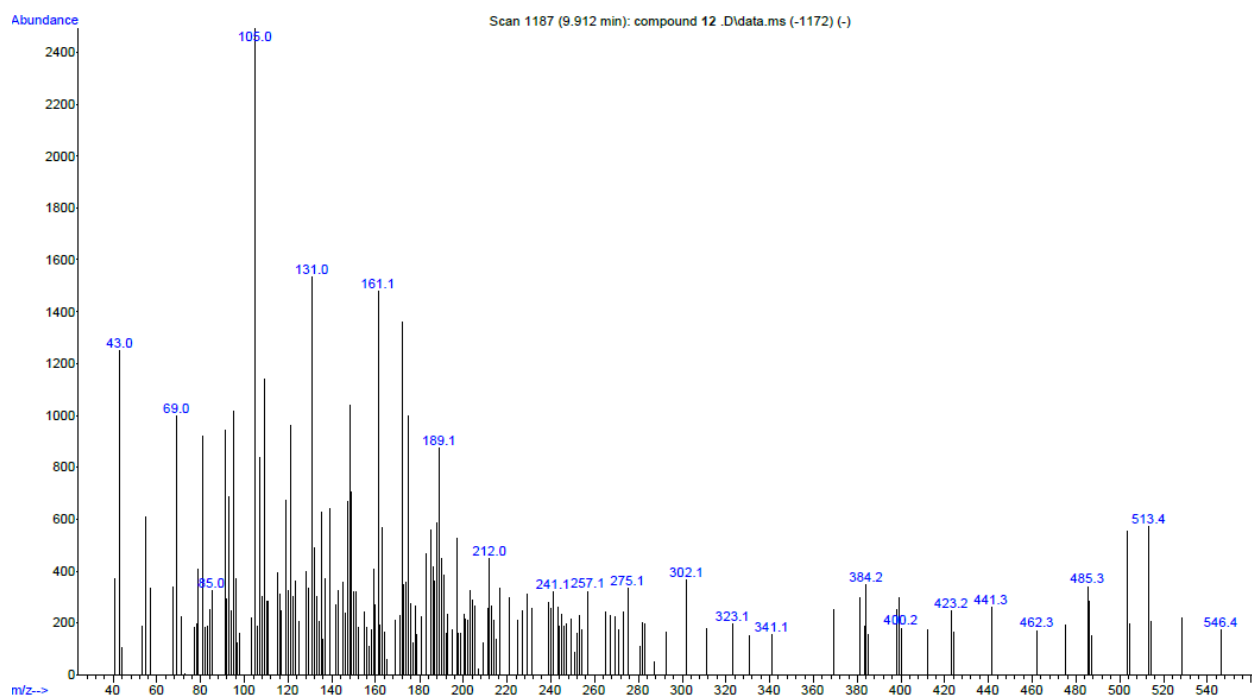

**$^1\text{H}$  NMR (1*S*,2*S*)-1 $\alpha$ -hydroxy-2-methyl-3-oxo-19 $\beta$ ,28-epoxy-18*aH*-oleanane (13)**

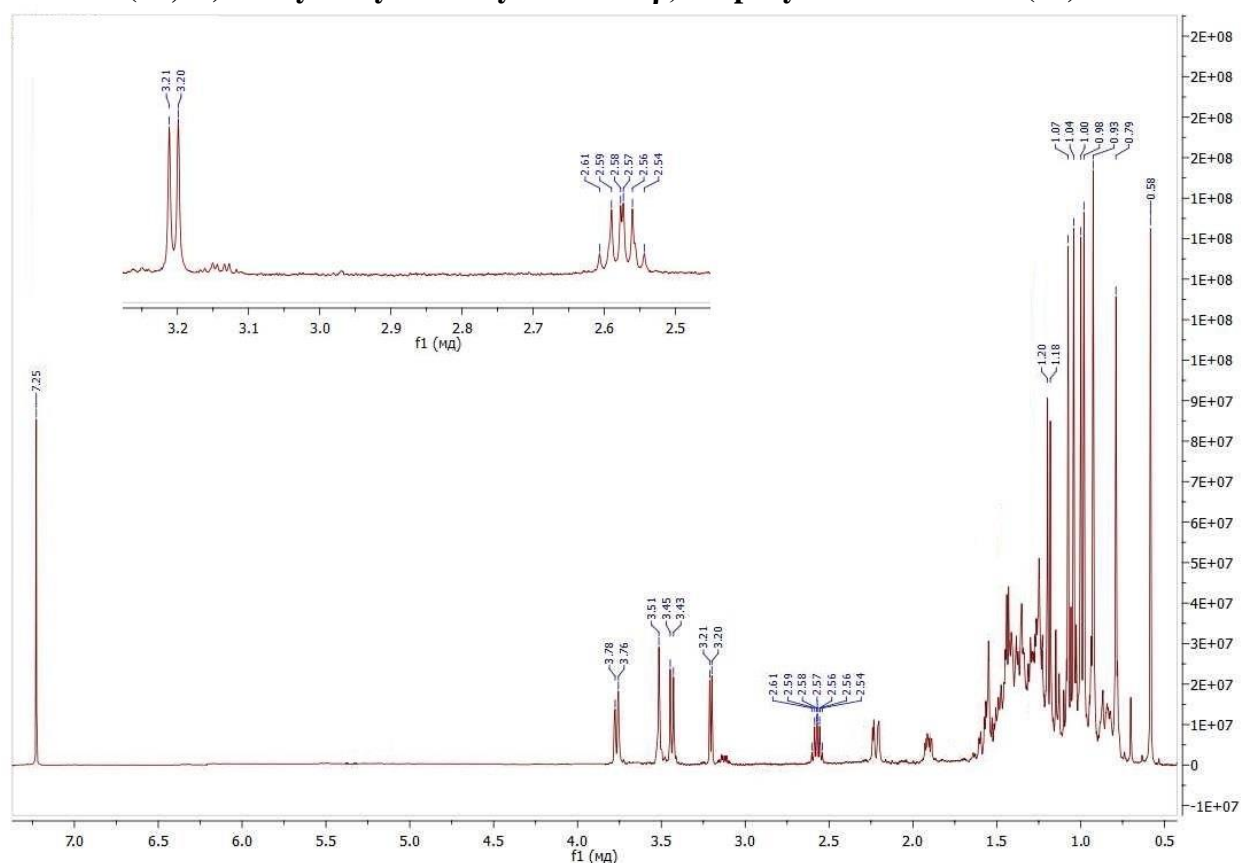

**$^{13}\text{C}$  NMR ( $\text{CDCl}_3$ ) (1*S*,2*S*)-1 $\alpha$ -hydroxy-2-methyl-3-oxo-19 $\beta$ ,28-epoxy-18*aH*-oleanane (13)**

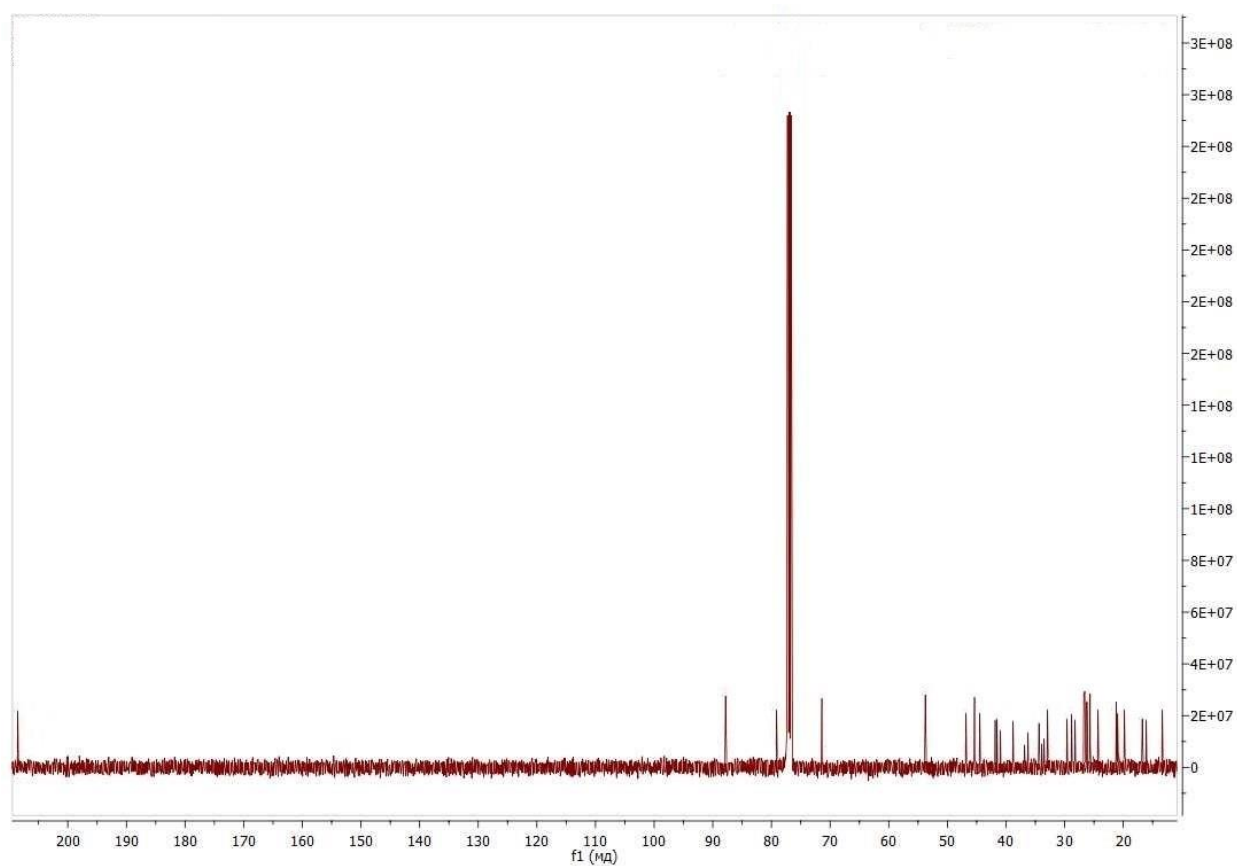

**GC-MS (1*S*,2*S*)-1 $\alpha$ -hydroxy-2-methyl-3-oxo-19 $\beta$ ,28-epoxy-18*a**H*-oleanane (13)**

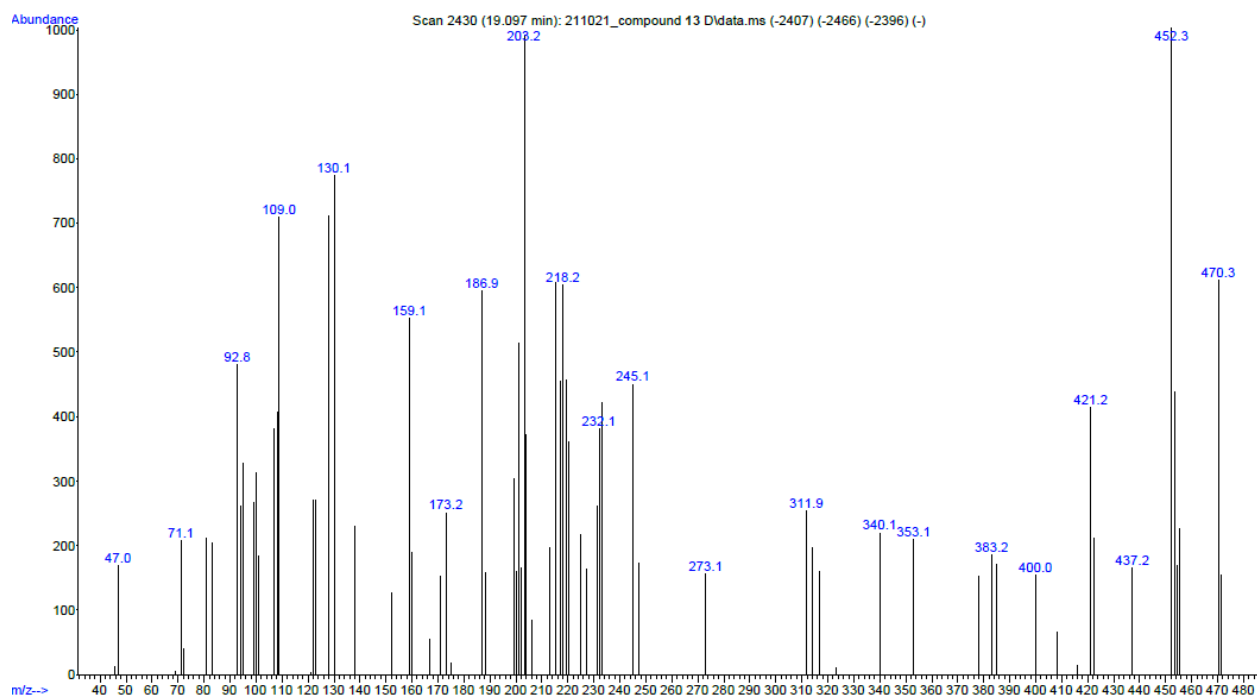

**$^1\text{H}$  NMR (1*S*,2*R*)-1 $\alpha$ -hydroxy-2-methyl-3-oxo-19 $\beta$ ,28-epoxy-18*a**H*-olean-1-ene (14)**

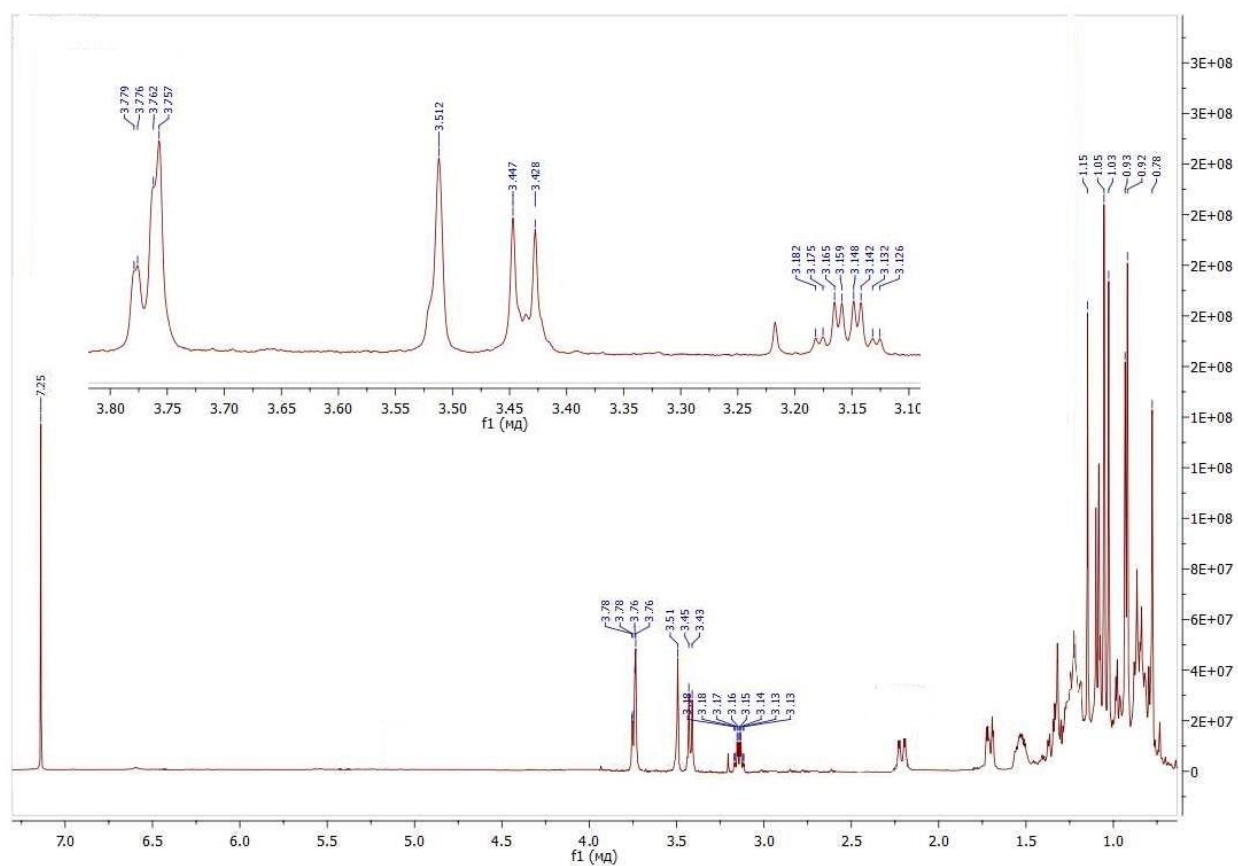

**<sup>13</sup>C NMR (CDCl<sub>3</sub>) (1*S*,2*R*)-1α-hydroxy-2-methyl-3-oxo-19β,28-epoxy-18α*H*-olean-1-ene (14)**

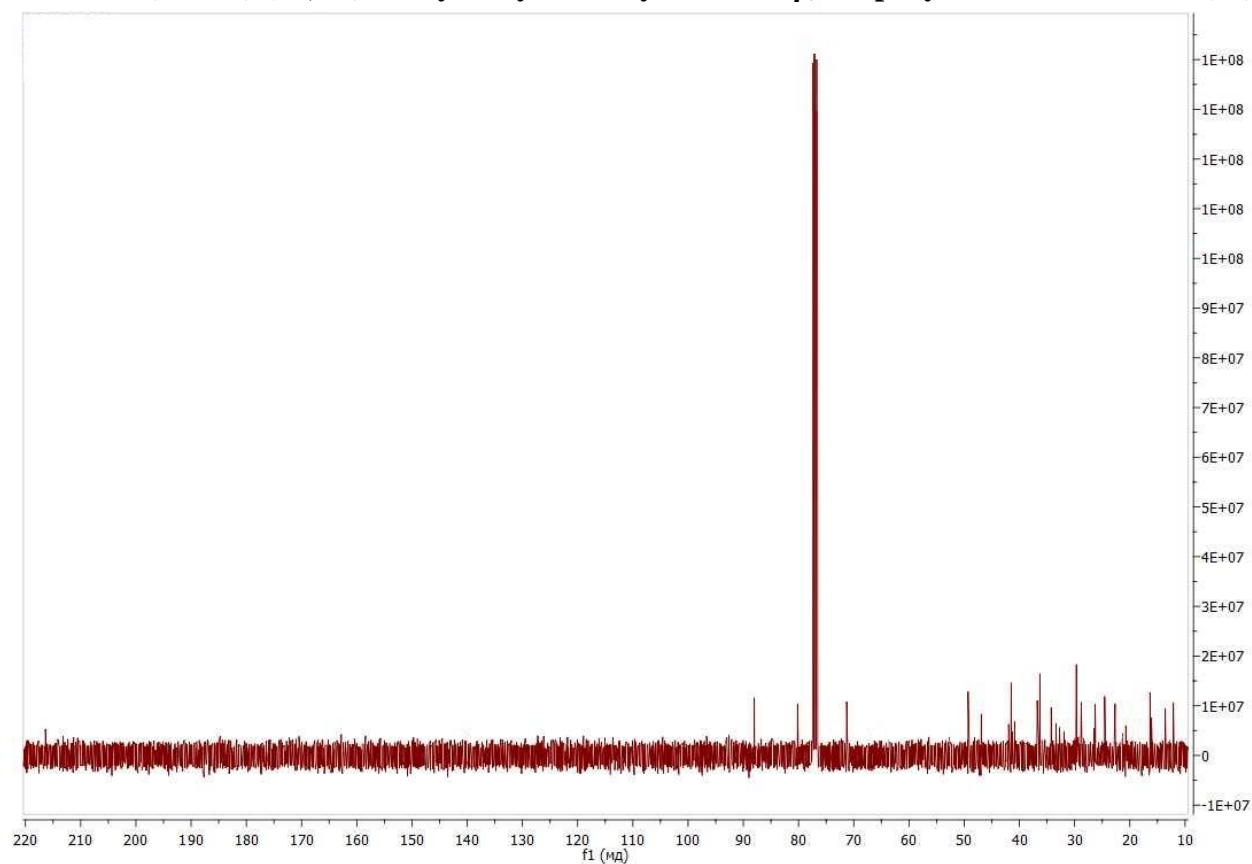

**GC-MS (1*S*,2*R*)-1α-hydroxy-2-methyl-3-oxo-19β,28-epoxy-18α*H*-olean-1-ene (14)**

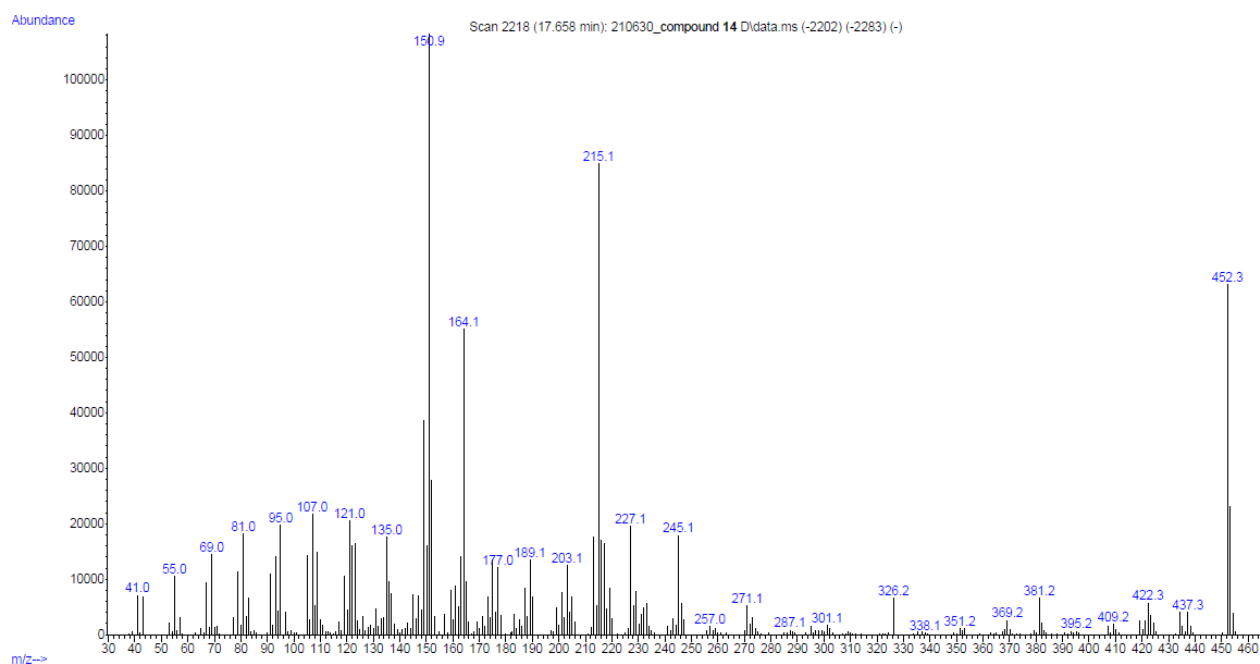

**$^1\text{H}$  NMR (1*S*,3*S*)-1 $\alpha$ ,3 $\beta$ -dihydroxy-3-ethyl-2-methylene-19 $\beta$ ,28-epoxy-18 $\alpha$ *H*-oleanane (15)**

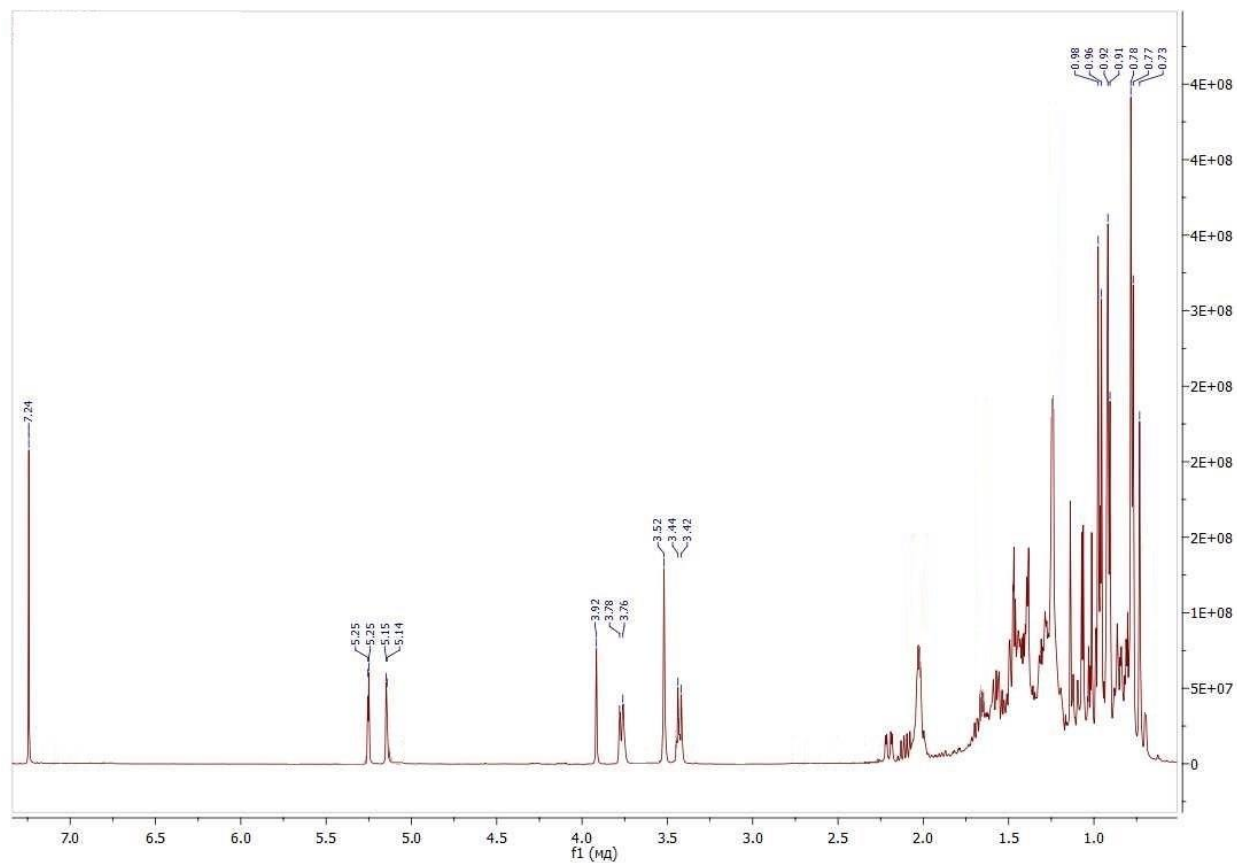

**$^{13}\text{C}$  NMR ( $\text{CDCl}_3$ ) (1*S*,3*S*)-1 $\alpha$ ,3 $\beta$ -dihydroxy-3-ethyl-2-methylene-19 $\beta$ ,28-epoxy-18 $\alpha$ *H*-oleanane (15)**

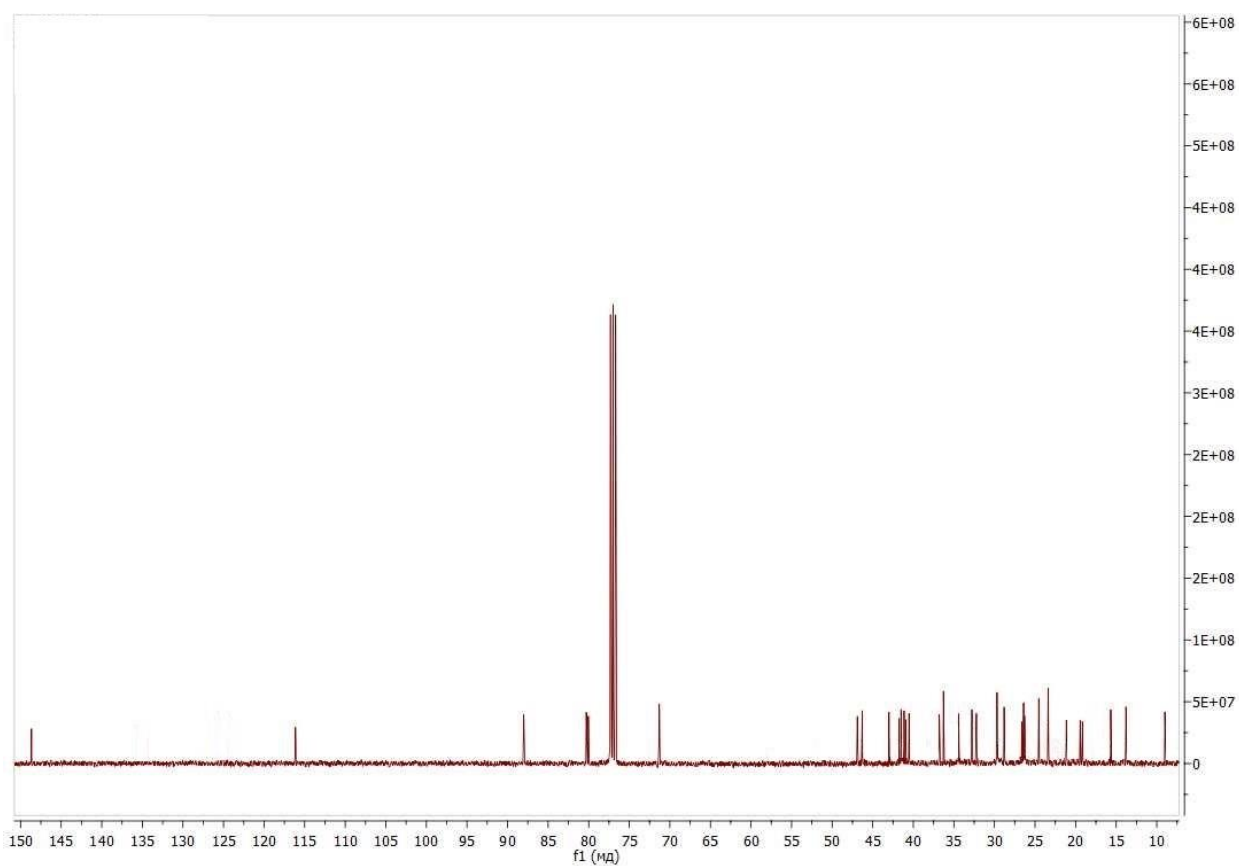

**GC-MS (1S,3S)-1 $\alpha$ ,3 $\beta$ -dihydroxy-3-ethyl-2-methylene-19 $\beta$ ,28-epoxy-18 $\alpha$ H-oleanane (15)**

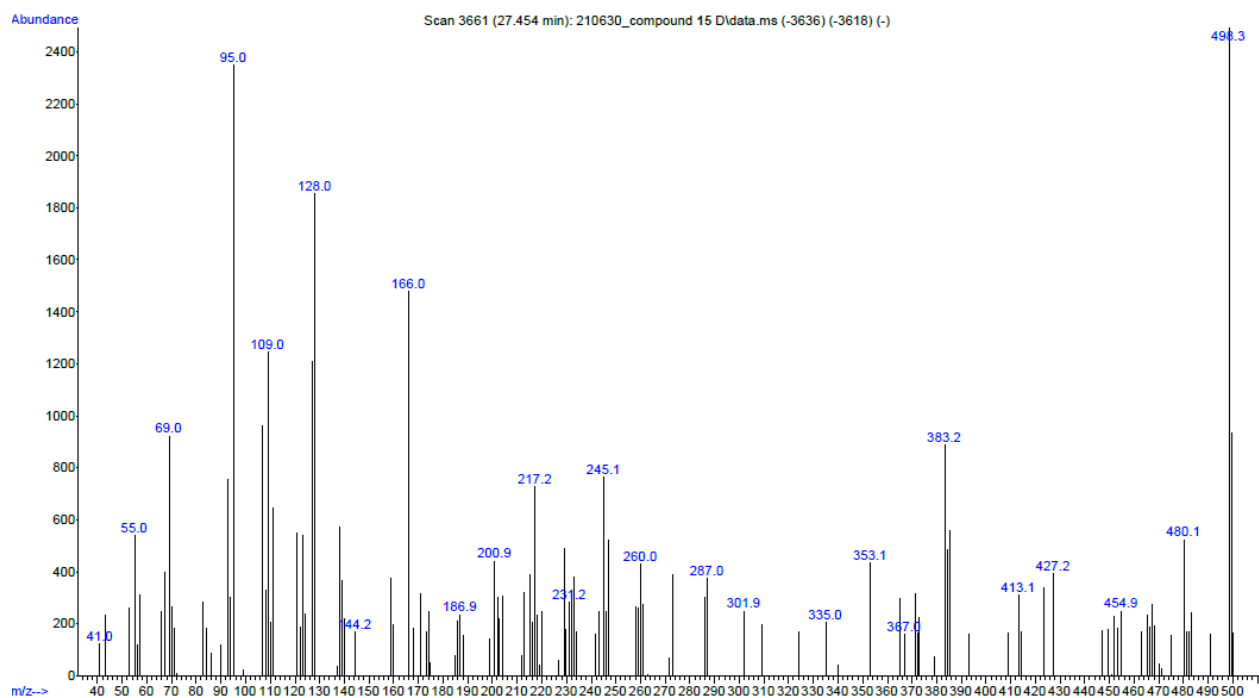

**$^1\text{H}$  NMR (2S,3S)-2,3-dimethyl-(2,3),(19 $\beta$ ,28)-diepoxy-18 $\alpha$ H-olean-1-one (16)**

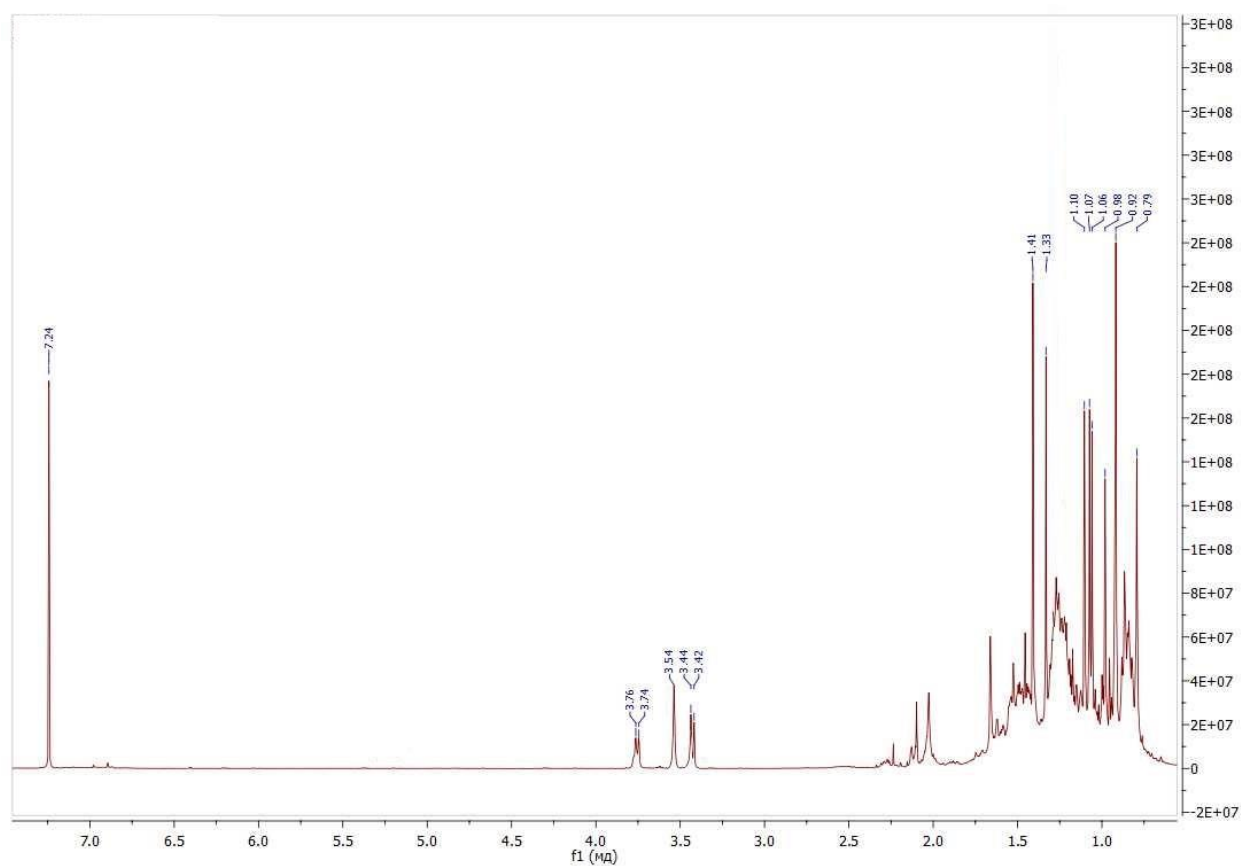

**<sup>13</sup>C NMR (CDCl<sub>3</sub>) (2*S*,3*S*)-2,3-dimethyl-(2,3),(19 $\beta$ ,28)-diepoxy-18 $\alpha$ *H*-olean-1-one (16)**

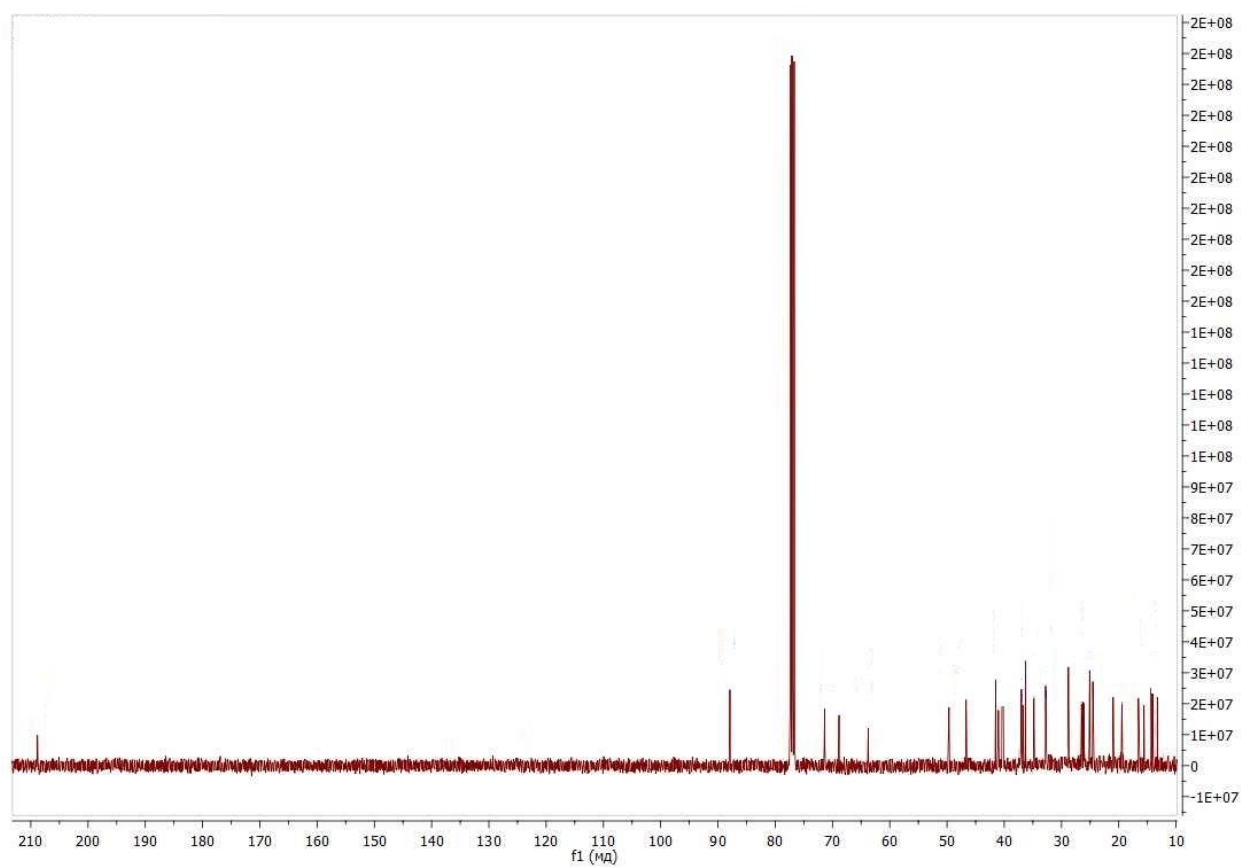

**GC-MS (2*S*,3*S*)-2,3-dimethyl-(2,3),(19 $\beta$ ,28)-diepoxy-18 $\alpha$ *H*-olean-1-one (16)**

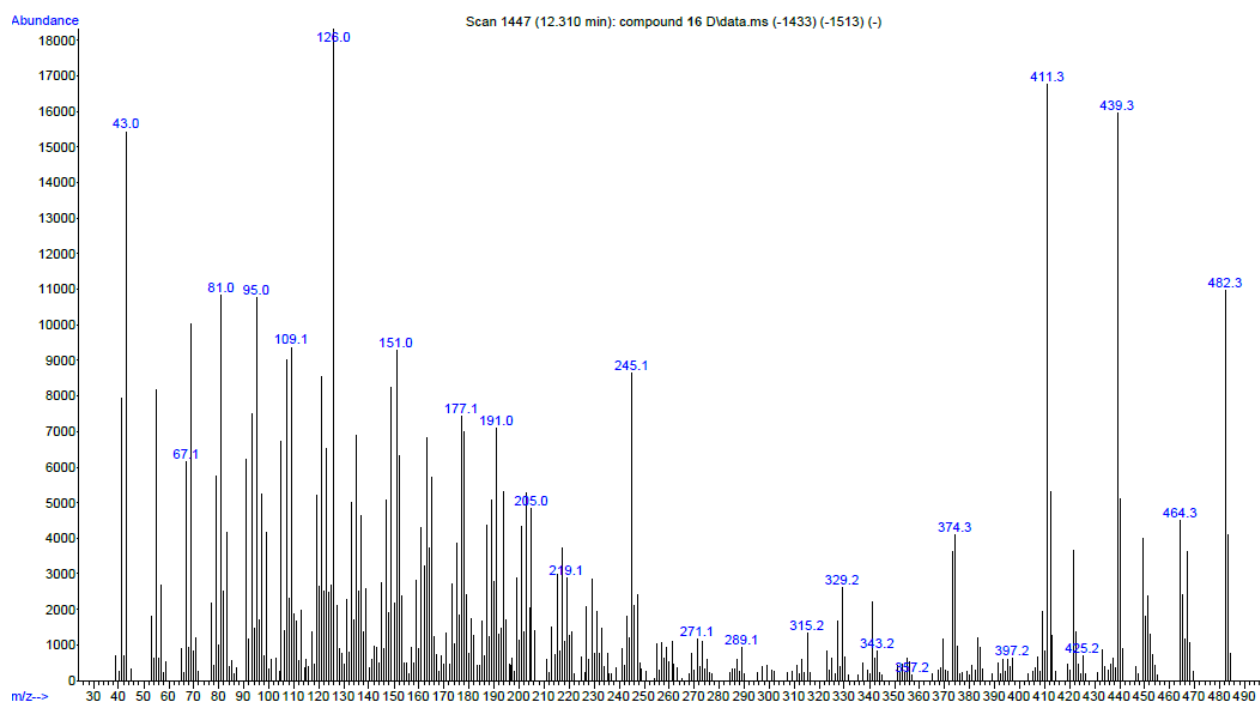

**$^1\text{H}$  NMR (2*S*,3*S*)-3-ethyl-2-methyl-(2,3),(19 $\beta$ ,28)-diepoxy-18*a**H*-olean-1-one (17)**

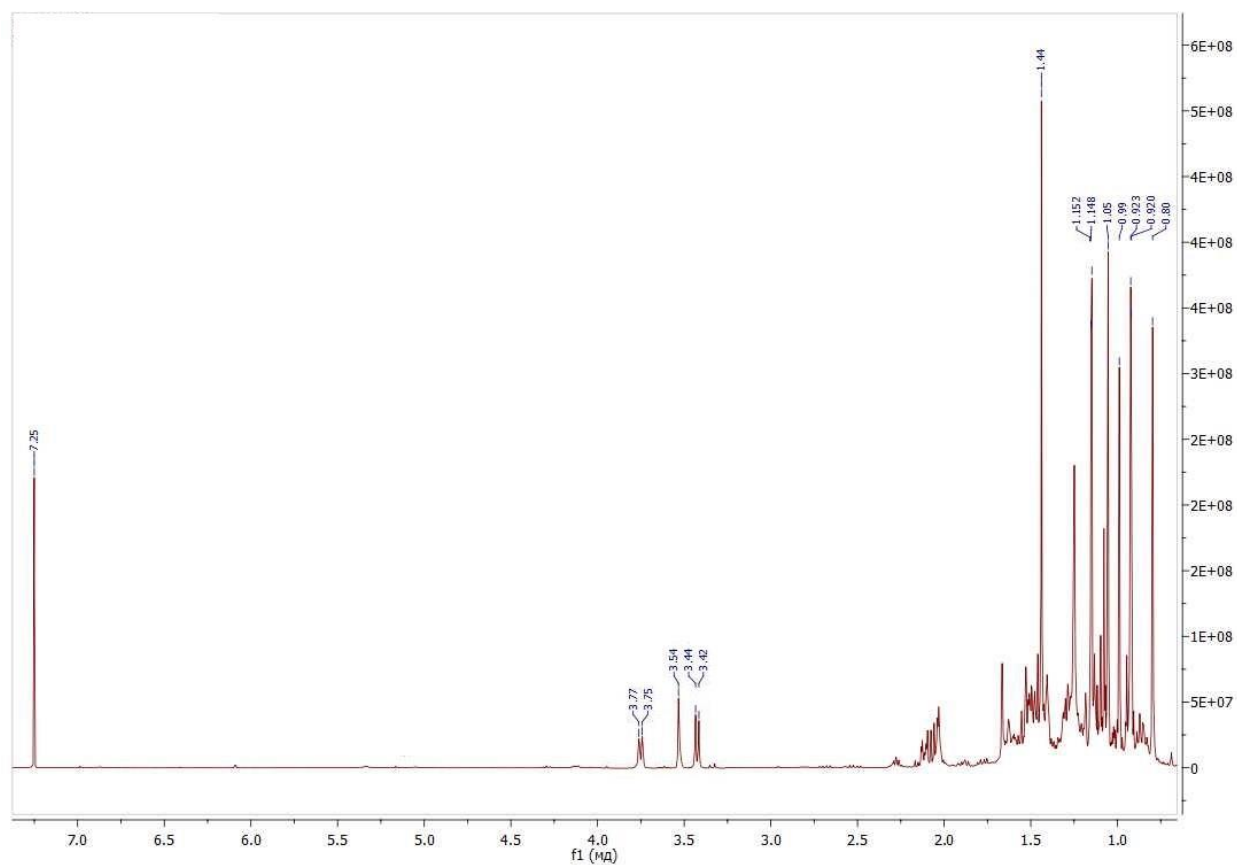

**$^{13}\text{C}$  NMR ( $\text{CDCl}_3$ ) (2*S*,3*S*)-3-ethyl-2-methyl-(2,3),(19 $\beta$ ,28)-diepoxy-18*a**H*-olean-1-one (17)**



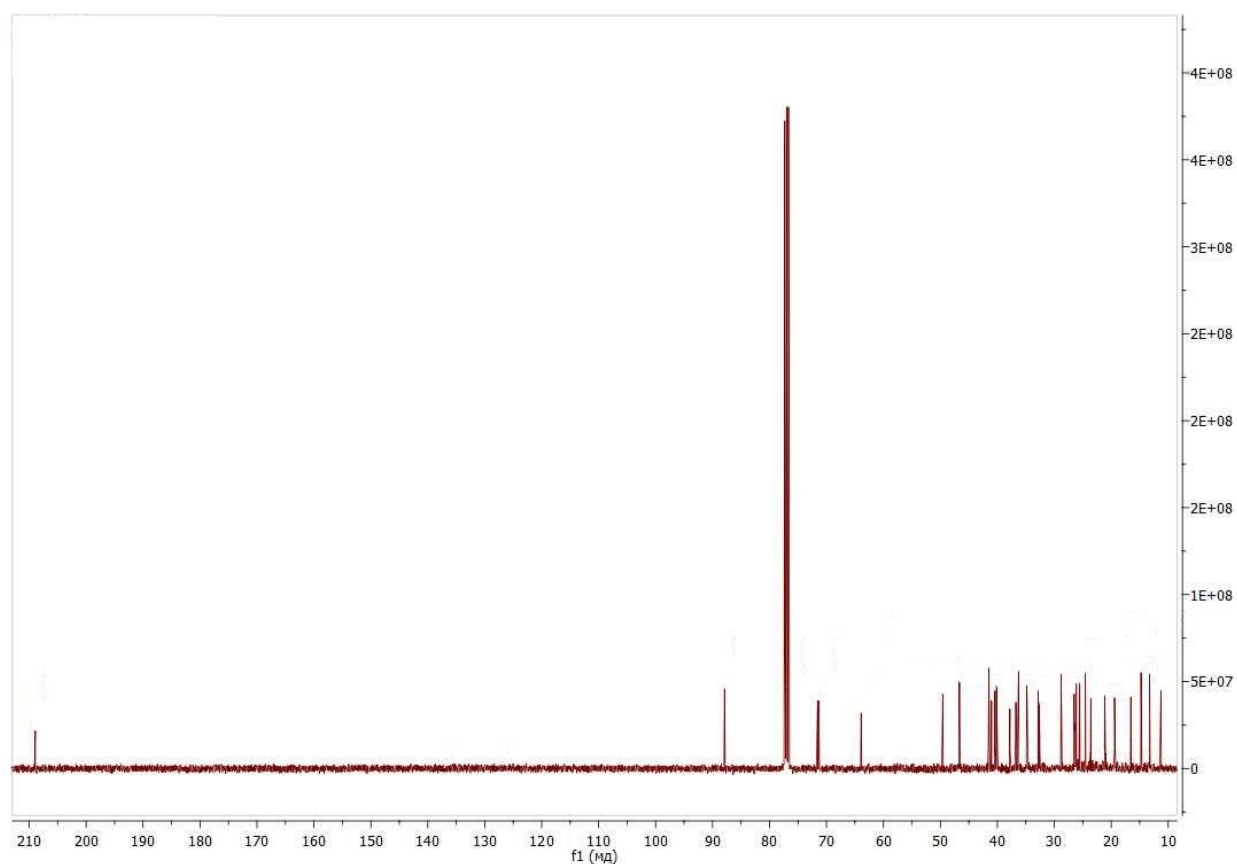

### GC-MS (2*S*,3*S*)-3-ethyl-2-methyl-(2,3),(19 $\beta$ ,28)-diepoxy-18 $\alpha$ *H*-olean-1-one (17)

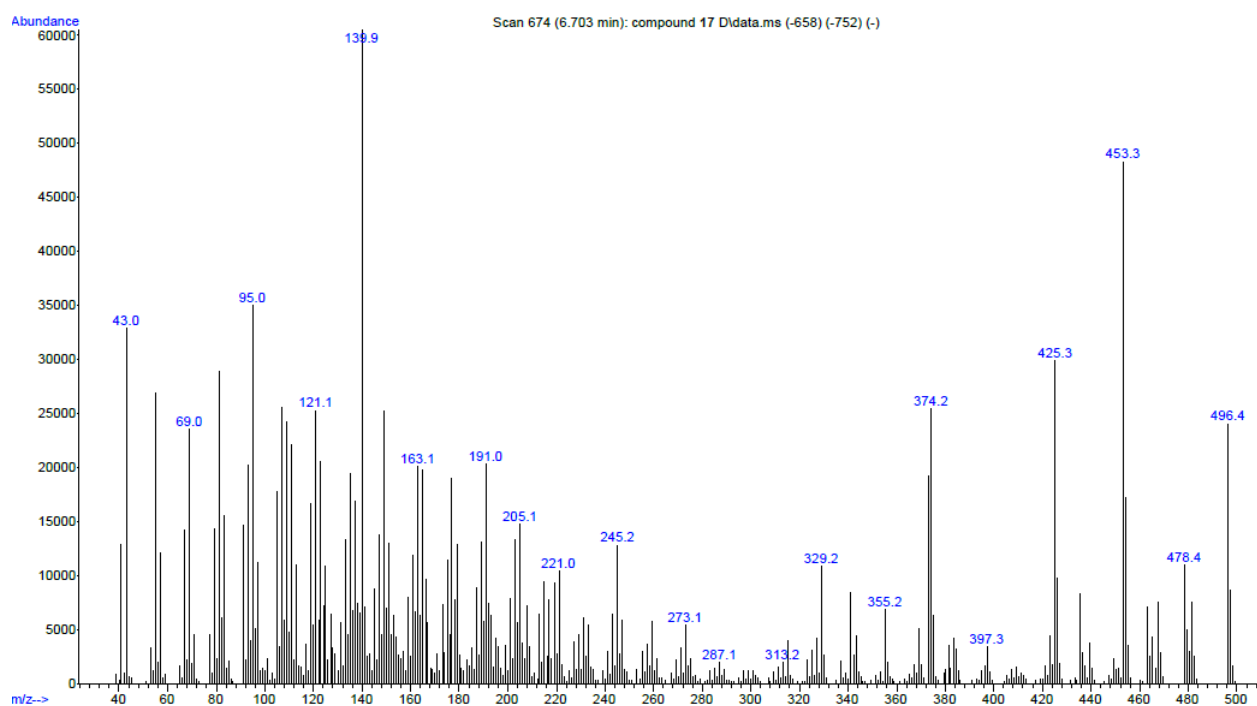

### Single crystal X-ray crystallographic analysis

**Table S1.** Crystal data and structure refinement for **3**.

|                   |                                                |
|-------------------|------------------------------------------------|
| Empirical formula | C <sub>31</sub> H <sub>50</sub> O <sub>2</sub> |
| Formula weight    | 454.71                                         |

|                                           |                                                                |
|-------------------------------------------|----------------------------------------------------------------|
| Temperature, K                            | 295.15                                                         |
| Crystal system                            | orthorhombic                                                   |
| Space group                               | P2 <sub>1</sub> 2 <sub>1</sub> 2 <sub>1</sub>                  |
| a, Å                                      | 7.8661(9)                                                      |
| b, Å                                      | 18.674(2)                                                      |
| c, Å                                      | 36.982(6)                                                      |
| Volume, Å <sup>3</sup>                    | 5432.2(13)                                                     |
| Z                                         | 8                                                              |
| Density (calculated), g/cm <sup>3</sup>   | 1.112                                                          |
| Absorption coefficient, mm <sup>-1</sup>  | 0.067                                                          |
| F(000)                                    | 2016.0                                                         |
| Crystal size, mm <sup>3</sup>             | 0.5 × 0.32 × 0.15                                              |
| Radiation                                 | MoKα (λ = 0.71073)                                             |
| 2Θ range for data collection, °           | 5.924 to 58.69                                                 |
| Index ranges                              | -10 ≤ h ≤ 7, -21 ≤ k ≤ 25, -48 ≤ l ≤ 45                        |
| Reflections collected                     | 35617                                                          |
| Independent reflections                   | 13094 [R <sub>int</sub> = 0.0458, R <sub>sigma</sub> = 0.0720] |
| Data/restraints/parameters                | 13094/2/619                                                    |
| Goodness-of-fit on F <sup>2</sup>         | 1.028                                                          |
| Final R indexes [I >= 2σ (I)]             | R <sub>1</sub> = 0.0615, wR <sub>2</sub> = 0.1164              |
| Final R indexes [all data]                | R <sub>1</sub> = 0.1138, wR <sub>2</sub> = 0.1417              |
| Largest diff. peak/hole, eÅ <sup>-3</sup> | 0.19/-0.18                                                     |

**Table S2.** Crystal data and structure refinement for **4a**.

|                                          |                                                               |
|------------------------------------------|---------------------------------------------------------------|
| Empirical formula                        | C <sub>31</sub> H <sub>48</sub> O <sub>3</sub>                |
| Formula weight                           | 468.69                                                        |
| Temperature, K                           | 295.15                                                        |
| Crystal system                           | monoclinic                                                    |
| Space group                              | P2 <sub>1</sub>                                               |
| a, Å                                     | 6.8715(19)                                                    |
| b, Å                                     | 12.581(3)                                                     |
| c, Å                                     | 15.706(4)                                                     |
| β, °                                     | 99.87(2)                                                      |
| Volume, Å <sup>3</sup>                   | 1337.7(6)                                                     |
| Z                                        | 2                                                             |
| Density (calculated), g/cm <sup>3</sup>  | 1.164                                                         |
| Absorption coefficient, mm <sup>-1</sup> | 0.072                                                         |
| F(000)                                   | 516.0                                                         |
| Crystal size, mm <sup>3</sup>            | 0.48 × 0.2 × 0.12                                             |
| Radiation                                | MoKα (λ = 0.71073)                                            |
| 2Θ range for data collection, °          | 6.018 to 58.694                                               |
| Index ranges                             | -9 ≤ h ≤ 8, -16 ≤ k ≤ 17, -20 ≤ l ≤ 19                        |
| Reflections collected                    | 11784                                                         |
| Independent reflections                  | 6210 [R <sub>int</sub> = 0.0344, R <sub>sigma</sub> = 0.0488] |
| Data/restraints/parameters               | 6210/1/315                                                    |
| Goodness-of-fit on F <sup>2</sup>        | 1.028                                                         |

|                                             |                                  |
|---------------------------------------------|----------------------------------|
| Final R indexes [ $I \geq 2\sigma(I)$ ]     | $R_1 = 0.0545$ , $wR_2 = 0.1188$ |
| Final R indexes [all data]                  | $R_1 = 0.0746$ , $wR_2 = 0.1347$ |
| Largest diff. peak/hole, $e\text{\AA}^{-3}$ | 0.14/-0.21                       |

**Table S3.** Crystal data and structure refinement for **7**.

|                                               |                                                                    |
|-----------------------------------------------|--------------------------------------------------------------------|
| Empirical formula                             | $C_{32}H_{52}O_2$                                                  |
| Formula weight                                | 468.73                                                             |
| Temperature, K                                | 295.15                                                             |
| Crystal system                                | orthorhombic                                                       |
| Space group                                   | $P2_12_12_1$                                                       |
| a, $\text{\AA}$                               | 12.059(3)                                                          |
| b, $\text{\AA}$                               | 13.264(3)                                                          |
| c, $\text{\AA}$                               | 17.403(3)                                                          |
| Volume, $\text{\AA}^3$                        | 2783.6(11)                                                         |
| Z                                             | 4                                                                  |
| Density (calculated), $\text{g/cm}^3$         | 1.118                                                              |
| Absorption coefficient, $\text{mm}^{-1}$      | 0.067                                                              |
| F(000)                                        | 1040.0                                                             |
| Crystal size, $\text{mm}^3$                   | $0.56 \times 0.45 \times 0.22$                                     |
| Radiation                                     | $\text{MoK}\alpha$ ( $\lambda = 0.71073$ )                         |
| $2\theta$ range for data collection, $^\circ$ | 6.144 to 58.632                                                    |
| Index ranges                                  | $-15 \leq h \leq 11$ , $-15 \leq k \leq 17$ , $-15 \leq l \leq 23$ |
| Reflections collected                         | 10656                                                              |
| Independent reflections                       | 6080 [ $R_{\text{int}} = 0.0272$ , $R_{\text{sigma}} = 0.0513$ ]   |
| Data/restraints/parameters                    | 6080/0/320                                                         |
| Goodness-of-fit on $F^2$                      | 1.039                                                              |
| Final R indexes [ $I \geq 2\sigma(I)$ ]       | $R_1 = 0.0551$ , $wR_2 = 0.1143$                                   |
| Final R indexes [all data]                    | $R_1 = 0.0801$ , $wR_2 = 0.1300$                                   |
| Largest diff. peak/hole, $e\text{\AA}^{-3}$   | 0.20/-0.16                                                         |

**Table S4.** Crystal data and structure refinement for **8**.

|                                          |                               |
|------------------------------------------|-------------------------------|
| Empirical formula                        | $C_{33}H_{54}O_2$             |
| Formula weight                           | 482.76                        |
| Temperature, K                           | 295.15                        |
| Crystal system                           | orthorhombic                  |
| Space group                              | $P2_12_12_1$                  |
| a, $\text{\AA}$                          | 12.230(3)                     |
| b, $\text{\AA}$                          | 13.313(3)                     |
| c, $\text{\AA}$                          | 17.488(3)                     |
| Volume, $\text{\AA}^3$                   | 2847.5(11)                    |
| Z                                        | 4                             |
| Density (calculated), $\text{g/cm}^3$    | 1.126                         |
| Absorption coefficient, $\text{mm}^{-1}$ | 0.067                         |
| F(000)                                   | 1072.0                        |
| Crystal size, $\text{mm}^3$              | $0.5 \times 0.35 \times 0.22$ |

|                                                    |                                                                    |
|----------------------------------------------------|--------------------------------------------------------------------|
| Radiation                                          | MoK $\alpha$ ( $\lambda = 0.71073$ )                               |
| 2 $\Theta$ range for data collection, $^{\circ}$   | 6.494 to 58.89                                                     |
| Index ranges                                       | $-14 \leq h \leq 15$ , $-18 \leq k \leq 14$ , $-23 \leq l \leq 22$ |
| Reflections collected                              | 14727                                                              |
| Independent reflections                            | 6740 [ $R_{\text{int}} = 0.0347$ , $R_{\text{sigma}} = 0.0544$ ]   |
| Data/restraints/parameters                         | 6740/1/329                                                         |
| Goodness-of-fit on $F^2$                           | 1.022                                                              |
| Final R indexes [ $I \geq 2\sigma(I)$ ]            | $R_1 = 0.0623$ , $wR_2 = 0.1413$                                   |
| Final R indexes [all data]                         | $R_1 = 0.0884$ , $wR_2 = 0.1603$                                   |
| Largest diff. peak/hole, $\text{e}\text{\AA}^{-3}$ | 0.40/-0.22                                                         |

**Table S5.** Crystal data and structure refinement for **12**.

|                                                    |                                                                   |
|----------------------------------------------------|-------------------------------------------------------------------|
| Empirical formula                                  | C <sub>37</sub> H <sub>54</sub> O <sub>3</sub>                    |
| Formula weight                                     | 546.80                                                            |
| Temperature, K                                     | 295.15                                                            |
| Crystal system                                     | monoclinic                                                        |
| Space group                                        | P2 <sub>1</sub>                                                   |
| a, $\text{\AA}$                                    | 7.7161(12)                                                        |
| b, $\text{\AA}$                                    | 20.087(3)                                                         |
| c, $\text{\AA}$                                    | 23.884(4)                                                         |
| $\beta$ , $^{\circ}$                               | 94.519(15)                                                        |
| Volume, $\text{\AA}^3$                             | 3690.5(10)                                                        |
| Z                                                  | 4                                                                 |
| Density (calculated), $\text{g}/\text{cm}^3$       | 0.984                                                             |
| Absorption coefficient, $\text{mm}^{-1}$           | 0.060                                                             |
| F(000)                                             | 1200.0                                                            |
| Crystal size, $\text{mm}^3$                        | $0.46 \times 0.28 \times 0.12$                                    |
| Radiation                                          | MoK $\alpha$ ( $\lambda = 0.71073$ )                              |
| 2 $\Theta$ range for data collection, $^{\circ}$   | 5.518 to 58.798                                                   |
| Index ranges                                       | $-9 \leq h \leq 10$ , $-25 \leq k \leq 27$ , $-30 \leq l \leq 32$ |
| Reflections collected                              | 42332                                                             |
| Independent reflections                            | 17443 [ $R_{\text{int}} = 0.0596$ , $R_{\text{sigma}} = 0.0944$ ] |
| Data/restraints/parameters                         | 17443/3/745                                                       |
| Goodness-of-fit on $F^2$                           | 0.933                                                             |
| Final R indexes [ $I \geq 2\sigma(I)$ ]            | $R_1 = 0.0599$ , $wR_2 = 0.1410$                                  |
| Final R indexes [all data]                         | $R_1 = 0.1365$ , $wR_2 = 0.1820$                                  |
| Largest diff. peak/hole, $\text{e}\text{\AA}^{-3}$ | 0.15/-0.15                                                        |

**Table S6.** Crystal data and structure refinement for **13**.

|                   |                                                |
|-------------------|------------------------------------------------|
| Empirical formula | C <sub>31</sub> H <sub>50</sub> O <sub>3</sub> |
| Formula weight    | 470.71                                         |
| Temperature, K    | 295.15                                         |
| Crystal system    | monoclinic                                     |
| Space group       | P2 <sub>1</sub>                                |
| a, $\text{\AA}$   | 7.102(2)                                       |

|                                           |                                                                |
|-------------------------------------------|----------------------------------------------------------------|
| b, Å                                      | 12.082(5)                                                      |
| c, Å                                      | 15.784(7)                                                      |
| $\beta$ , °                               | 95.88(4)                                                       |
| Volume, Å <sup>3</sup>                    | 1347.2(9)                                                      |
| Z                                         | 2                                                              |
| Density (calculated), g/cm <sup>3</sup>   | 1.160                                                          |
| Absorption coefficient, mm <sup>-1</sup>  | 0.072                                                          |
| F(000)                                    | 520.0                                                          |
| Crystal size, mm <sup>3</sup>             | 0.5 × 0.4 × 0.02                                               |
| Radiation                                 | Mo K $\alpha$ ( $\lambda$ = 0.71073)                           |
| 2 $\Theta$ range for data collection, °   | 6.076 to 58.776                                                |
| Index ranges                              | -9 ≤ h ≤ 7, -16 ≤ k ≤ 10, -20 ≤ l ≤ 17                         |
| Reflections collected                     | 6513                                                           |
| Independent reflections                   | 4585 [ $R_{\text{int}}$ = 0.0587, $R_{\text{sigma}}$ = 0.1026] |
| Data/restraints/parameters                | 4585/1/319                                                     |
| Goodness-of-fit on $F^2$                  | 1.025                                                          |
| Final R indexes [ $I \geq 2\sigma(I)$ ]   | $R_1$ = 0.0761, $wR_2$ = 0.1794                                |
| Final R indexes [all data]                | $R_1$ = 0.1293, $wR_2$ = 0.2248                                |
| Largest diff. peak/hole, eÅ <sup>-3</sup> | 0.25/-0.26                                                     |

**Table S7.** Crystal data and structure refinement for **14**.

|                                           |                                                                    |
|-------------------------------------------|--------------------------------------------------------------------|
| Empirical formula                         | C <sub>31</sub> H <sub>50</sub> O <sub>3</sub> ·2CHCl <sub>3</sub> |
| Formula weight                            | 709.44                                                             |
| Temperature, K                            | 295.15                                                             |
| Crystal system                            | orthorhombic                                                       |
| Space group                               | P2 <sub>1</sub> 2 <sub>1</sub> 2 <sub>1</sub>                      |
| a, Å                                      | 10.753(2)                                                          |
| b, Å                                      | 11.3197(17)                                                        |
| c, Å                                      | 29.710(7)                                                          |
| Volume, Å <sup>3</sup>                    | 3616.2(12)                                                         |
| Z                                         | 4                                                                  |
| Density (calculated), g/cm <sup>3</sup>   | 1.303                                                              |
| Absorption coefficient, mm <sup>-1</sup>  | 0.506                                                              |
| F(000)                                    | 1504.0                                                             |
| Crystal size, mm <sup>3</sup>             | 0.45 × 0.35 × 0.2                                                  |
| Radiation                                 | Mo K $\alpha$ ( $\lambda$ = 0.71073)                               |
| 2 $\Theta$ range for data collection, °   | 5.902 to 58.562                                                    |
| Index ranges                              | -13 ≤ h ≤ 14, -15 ≤ k ≤ 9, -25 ≤ l ≤ 40                            |
| Reflections collected                     | 17455                                                              |
| Independent reflections                   | 8303 [ $R_{\text{int}}$ = 0.0429, $R_{\text{sigma}}$ = 0.0778]     |
| Data/restraints/parameters                | 8303/0/388                                                         |
| Goodness-of-fit on $F^2$                  | 1.023                                                              |
| Final R indexes [ $I \geq 2\sigma(I)$ ]   | $R_1$ = 0.0679, $wR_2$ = 0.1544                                    |
| Final R indexes [all data]                | $R_1$ = 0.1453, $wR_2$ = 0.1940                                    |
| Largest diff. peak/hole, eÅ <sup>-3</sup> | 0.28/-0.28                                                         |
| Flack parameter                           | 0.02(4)                                                            |

**Table S8.** Crystal data and structure refinement for **15**.

|                                           |                                                               |
|-------------------------------------------|---------------------------------------------------------------|
| Empirical formula                         | C <sub>33</sub> H <sub>54</sub> O <sub>3</sub>                |
| Formula weight                            | 498.76                                                        |
| Temperature, K                            | 295.15                                                        |
| Crystal system                            | orthorhombic                                                  |
| Space group                               | P2 <sub>1</sub> 2 <sub>1</sub> 2 <sub>1</sub>                 |
| a, Å                                      | 7.2239(17)                                                    |
| b, Å                                      | 12.282(3)                                                     |
| c, Å                                      | 32.677(7)                                                     |
| Volume, Å <sup>3</sup>                    | 2899.1(12)                                                    |
| Z                                         | 4                                                             |
| Density (calculated), g/cm <sup>3</sup>   | 1.143                                                         |
| Absorption coefficient, mm <sup>-1</sup>  | 0.070                                                         |
| F(000)                                    | 1104.0                                                        |
| Crystal size, mm <sup>3</sup>             | 0.5 × 0.15 × 0.1                                              |
| Radiation                                 | Mo Kα (λ = 0.71073)                                           |
| 2Θ range for data collection, °           | 5.776 to 59.188                                               |
| Index ranges                              | -6 ≤ h ≤ 9, -16 ≤ k ≤ 10, -30 ≤ l ≤ 43                        |
| Reflections collected                     | 11280                                                         |
| Independent reflections                   | 6564 [R <sub>int</sub> = 0.0374, R <sub>sigma</sub> = 0.0640] |
| Data/restraints/parameters                | 6564/0/338                                                    |
| Goodness-of-fit on F <sup>2</sup>         | 1.028                                                         |
| Final R indexes [I ≥ 2σ (I)]              | R <sub>1</sub> = 0.0701, wR <sub>2</sub> = 0.1667             |
| Final R indexes [all data]                | R <sub>1</sub> = 0.1005, wR <sub>2</sub> = 0.1948             |
| Largest diff. peak/hole, eÅ <sup>-3</sup> | 0.44/-0.23                                                    |

**Table S9.** Crystal data and structure refinement for **16**.

|                                          |                                                |
|------------------------------------------|------------------------------------------------|
| Empirical formula                        | C <sub>32</sub> H <sub>50</sub> O <sub>3</sub> |
| Formula weight                           | 482.72                                         |
| Temperature, K                           | 295.15                                         |
| Crystal system                           | monoclinic                                     |
| Space group                              | P2 <sub>1</sub>                                |
| a, Å                                     | 6.7002(16)                                     |
| b, Å                                     | 15.587(3)                                      |
| c, Å                                     | 13.665(4)                                      |
| β, °                                     | 103.50(3)                                      |
| Volume, Å <sup>3</sup>                   | 1387.7(6)                                      |
| Z                                        | 2                                              |
| Density (calculated), g/cm <sup>3</sup>  | 1.155                                          |
| Absorption coefficient, mm <sup>-1</sup> | 0.072                                          |
| F(000)                                   | 532.0                                          |
| Crystal size, mm <sup>3</sup>            | 0.55 × 0.36 × 0.24                             |
| Radiation                                | MoKα (λ = 0.71073)                             |
| 2Θ range for data collection, °          | 6.06 to 58.75                                  |
| Index ranges                             | -8 ≤ h ≤ 9, -20 ≤ k ≤ 20, -18 ≤ l ≤ 11         |

|                                            |                                                                  |
|--------------------------------------------|------------------------------------------------------------------|
| Reflections collected                      | 7208                                                             |
| Independent reflections                    | 5266 [ $R_{\text{int}} = 0.0391$ , $R_{\text{sigma}} = 0.0549$ ] |
| Data/restraints/parameters                 | 5266/1/325                                                       |
| Goodness-of-fit on $F^2$                   | 1.032                                                            |
| Final R indexes [ $I \geq 2\sigma(I)$ ]    | $R_1 = 0.0585$ , $wR_2 = 0.1389$                                 |
| Final R indexes [all data]                 | $R_1 = 0.0788$ , $wR_2 = 0.1595$                                 |
| Largest diff. peak/hole, $\text{\AA}^{-3}$ | 0.23/-0.22                                                       |

**Table S10.** Crystal data and structure refinement for **17**.

|                                               |                                                                    |
|-----------------------------------------------|--------------------------------------------------------------------|
| Empirical formula                             | $\text{C}_{33}\text{H}_{52}\text{O}_3$                             |
| Formula weight                                | 496.74                                                             |
| Temperature, K                                | 295.15                                                             |
| Crystal system                                | monoclinic                                                         |
| Space group                                   | $P2_1$                                                             |
| a, $\text{\AA}$                               | 8.011(3)                                                           |
| b, $\text{\AA}$                               | 15.691(4)                                                          |
| c, $\text{\AA}$                               | 11.978(4)                                                          |
| $\beta$ , $^\circ$                            | 107.98(4)                                                          |
| Volume, $\text{\AA}^3$                        | 1432.1(8)                                                          |
| Z                                             | 2                                                                  |
| Density (calculated), $\text{g/cm}^3$         | 1.152                                                              |
| Absorption coefficient, $\text{mm}^{-1}$      | 0.071                                                              |
| F(000)                                        | 548.0                                                              |
| Crystal size, $\text{mm}^3$                   | $0.56 \times 0.44 \times 0.35$                                     |
| Radiation                                     | $\text{MoK}\alpha$ ( $\lambda = 0.71073$ )                         |
| $2\theta$ range for data collection, $^\circ$ | 5.944 to 58.522                                                    |
| Index ranges                                  | $-10 \leq h \leq 10$ , $-20 \leq k \leq 21$ , $-15 \leq l \leq 14$ |
| Reflections collected                         | 7225                                                               |
| Independent reflections                       | 5551 [ $R_{\text{int}} = 0.0463$ , $R_{\text{sigma}} = 0.0757$ ]   |
| Data/restraints/parameters                    | 5551/1/334                                                         |
| Goodness-of-fit on $F^2$                      | 1.022                                                              |
| Final R indexes [ $I \geq 2\sigma(I)$ ]       | $R_1 = 0.0724$ , $wR_2 = 0.1681$                                   |
| Final R indexes [all data]                    | $R_1 = 0.1003$ , $wR_2 = 0.2028$                                   |
| Largest diff. peak/hole, $\text{\AA}^{-3}$    | 0.28/-0.26                                                         |
